# Supplementary material for: Myogenin controls via AKAP6 non-centrosomal microtubule-organizing center formation at the nuclear envelope
Source: eLife journal article supplement (doi:10.7554/elife.65672), 2021-10-04

## Becker R *et al.*, Figure 2 - source data 2

Uncropped gel images for Figure 2J. The bands shown in panel 2J are marked by the dashed red line.

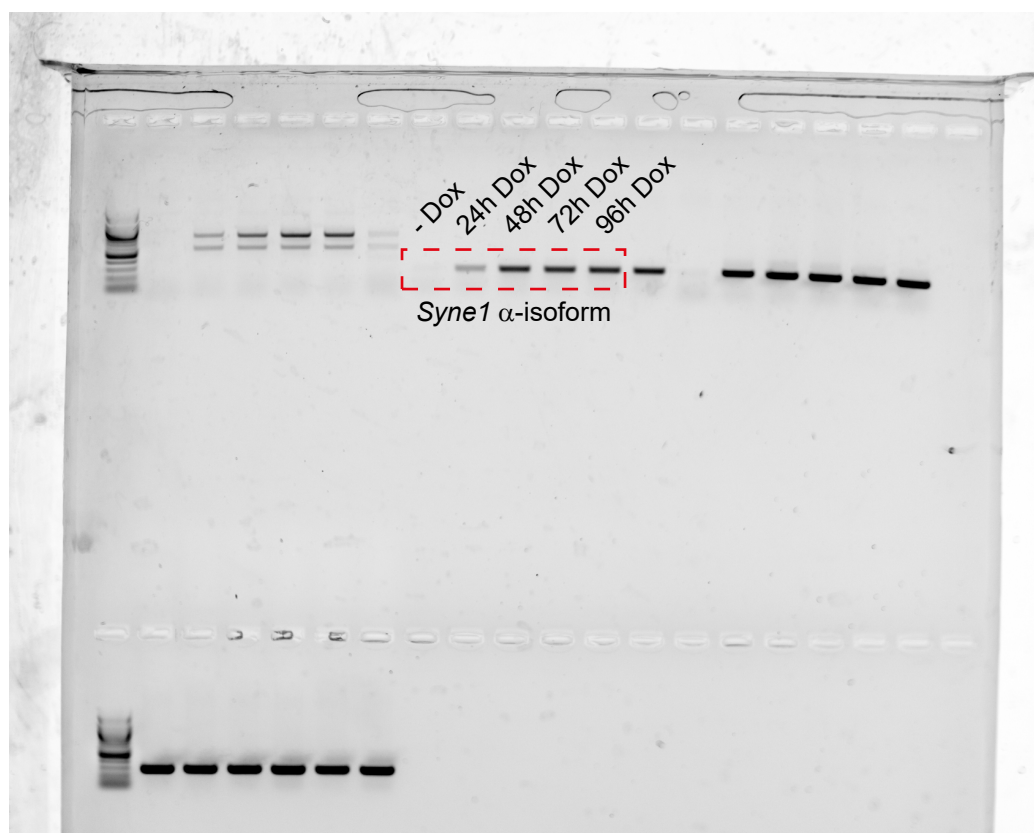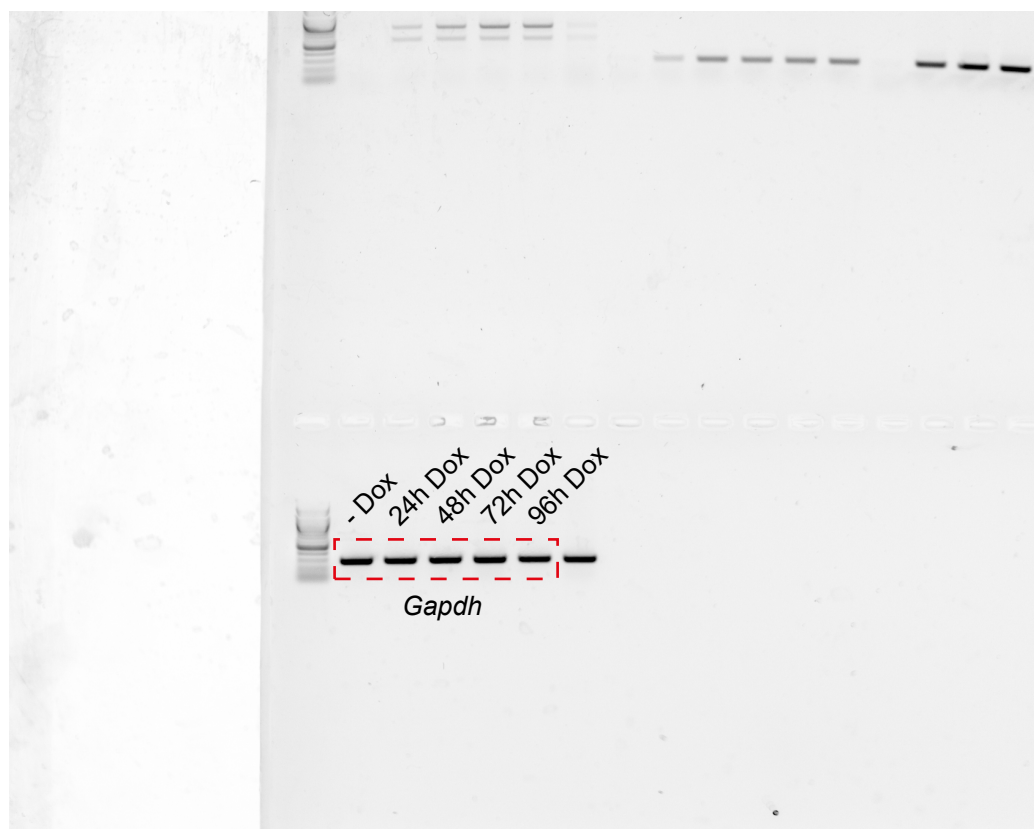

Supplement: fig2-data2 [file elife-65672-fig2-data2-v2.zip]
