# Supplementary material for: Myogenin controls via AKAP6 non-centrosomal microtubule-organizing center formation at the nuclear envelope
Source: eLife journal article supplement (doi:10.7554/elife.65672), 2021-10-04

# Becker R *et al.*, Figure 2 - figure supplement 1 source data 1

Uncropped gel images for Figure 2 - figure supplement 1C. The bands shown in panel 1C are marked by the dashed red line.

## left gel images

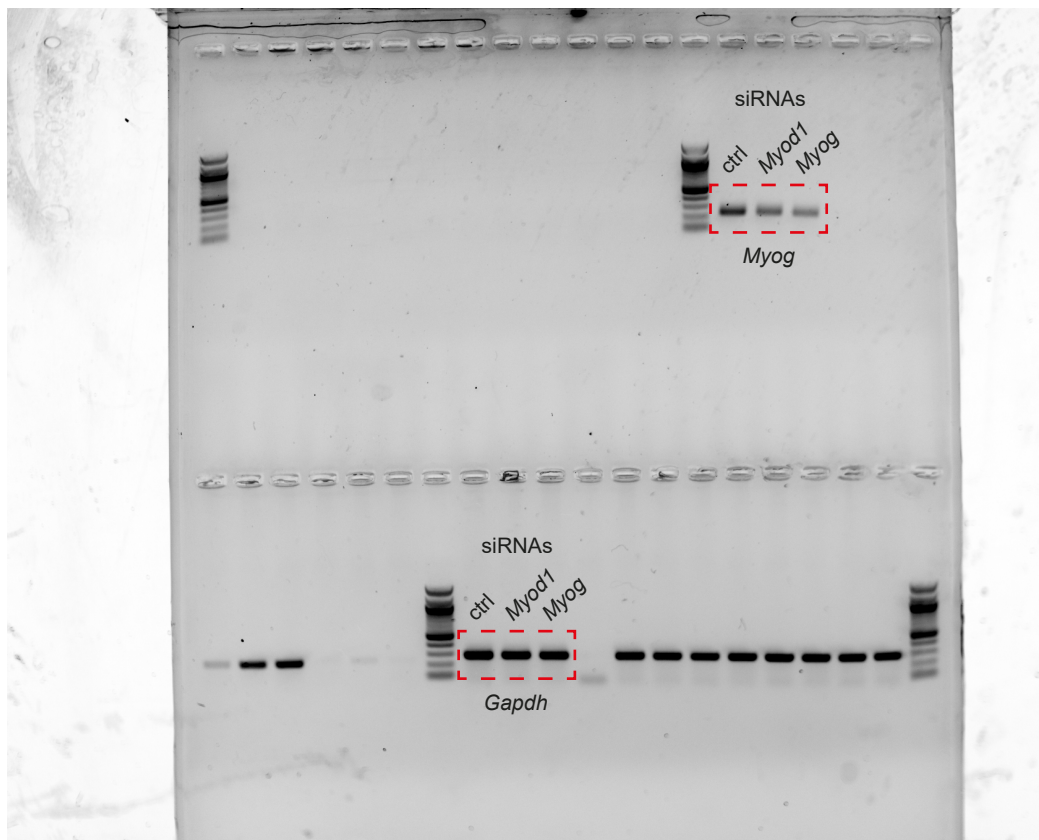

## right gel images

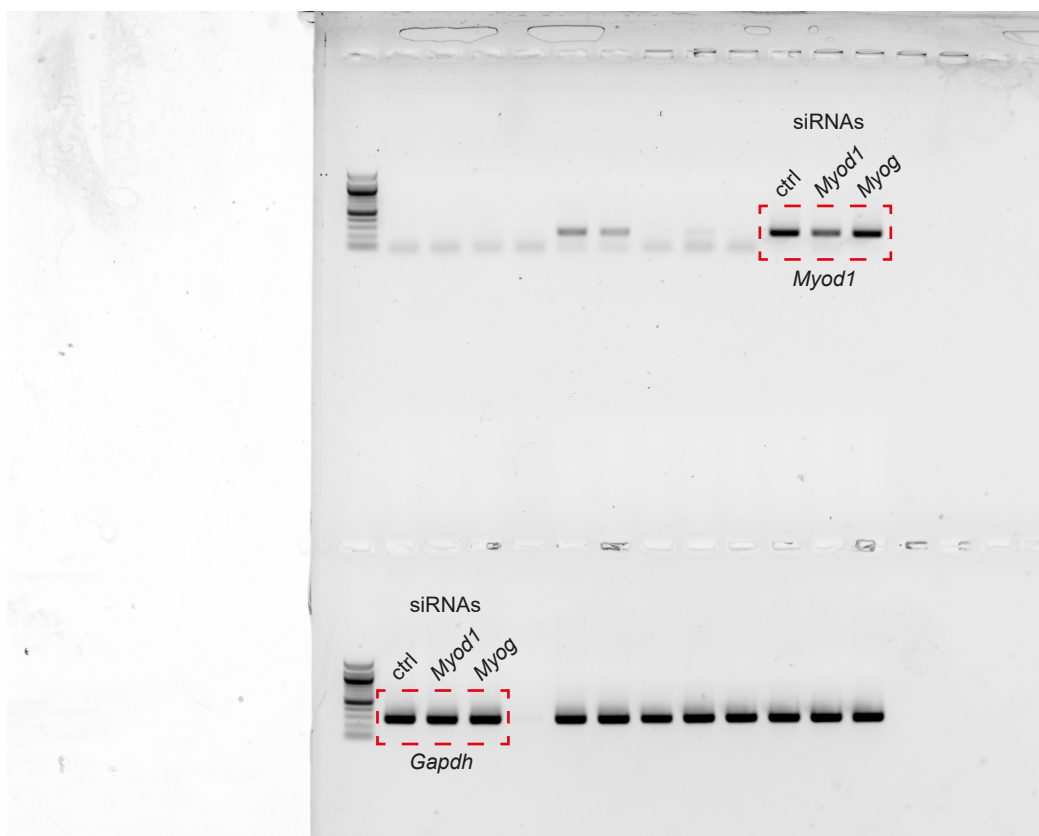

Supplement: fig2-figsupp1-data1 [file elife-65672-fig2-figsupp1-data1-v2.zip]
