# Supplementary material for: Myogenin controls via AKAP6 non-centrosomal microtubule-organizing center formation at the nuclear envelope
Source: eLife. 2021 Oct 4;10:e65672. doi: 10.7554/eLife.65672 (PMC8523159; doi:10.7554/eLife.65672)
Supplement: Figure 1—source data 1. [file elife-65672-fig1-data1.xlsx]

## Sheet: Fig. 1C
		C2C12 nuclei [%]
		MyoD+	Myog+	Nesprin+	PCM1+
	Exp #1	56.9	12.1	8.1	2.2
	Exp #2	43.4	11	7.5	1.9
	Exp #3	46.9	12.8	7.8	1.7

## Sheet: Fig. 1F
		C2C12 nuclei [%]
		Exp #1	Exp #2	Exp #3	Exp #1	Exp #2	Exp #3	Exp #1	Exp #2	Exp #3	Exp #1	Exp #2	Exp #3
		Nesprin+			PCM1+			Pcnt+			AKAP9+
	si-ctrl	17.4	20.1	16.9	10.6	13	11.1	6.8	6.84	6.91	6.95	6.3	7.27
	si-Myog	16.3	18.1	16.8	1.4	3	2.5	1.36	1.37	1.38	1.39	1.26	1.45
