# Supplementary material for: Myogenin controls via AKAP6 non-centrosomal microtubule-organizing center formation at the nuclear envelope
Source: eLife. 2021 Oct 4;10:e65672. doi: 10.7554/eLife.65672 (PMC8523159; doi:10.7554/eLife.65672)
Supplement: Figure 2—source data 1. [file elife-65672-fig2-data1.xlsx]

## Sheet: Fig. 2B
	PCM1 +
	MyoD-GFP [%]	Myog-GFP [%]
Exp #1	26	67.67
Exp #2	21.4	65.87
Exp #3	23.73	57.9

## Sheet: Fig. 2D
PCM-1	Nuclear envleope coverage [%]
	mScarlet	MYOG-mScarlet
	15.86	21.429
	1.843	21.091
	2.137	6.161
	19.597	8.261
	0.246	9.358
	14.634	50.402
	0.581	8.419
	9.685	41.317
	11.78	67.333
	14.096	42.748
	13.585	91.538
	1.852	53.239
	21.914	15.158
	0.5	10.685
	27.885	51.619
	3.218	41.972
	2.183	71.285
	1.087	63.636
	1.157	28.692
	6.68	20.04
	30.5	12.097
	4.898	16.736
	3.521	80.833
	10.345	38.341
	15.385	14.097
	2.381	13.861
	13	33.726
	16.568	30.944
	5.344	79.545
	4.658	53.846
	8.947	20.705
	5.076	5.221
	7.5	8.159
	12.439	3.974
	1.22	36.09
	1.25	9.239
	18.09	34.133
	13.73	28.182
	14.136	22.512
	11.667	20.13
	14.679	43.75
	13.877	57.93
	10.39	28.924
	0.636	10.891
	5.116	36.771
	10.29	55.581
	29.565	22.959
	0.552	49.289
	1.232	29.412
	11.088	30.655
	11.23	35.65
	4.976	21.942
	7.229	16.742
	21.99	45.951
	4.545	55.592
	14.286	39.823
	33.684	22.222
	21.545	10.924
	10.714	5.664
	20.058	16.667
	4.076	65.517
	1.682	10.996
	1.053	82.045
	7.851	18.559
	29.62	26.923
	18.64	69.935
	12.329	18.75
	6	26.41
	10.094	57.53
	3.518
	8.286	24.348
	7.857	17.29
	5.044	62.893
	9.392	1.672
	13.75	9.848
	32.368	3.433
	22.662	39.783
	12.619	57.905
	37.571	5.957
	26.638	11.814
	23.429	9.624
	22.848	37.811
	9.836	34.259
	9.773	46.329
	11.198	11.932
	1.642	16.438
	0.333	30.365
	17.987	5.263
	17.172	44.375
	17.2	15.297
	18.759	3.289
	17.617	40.598
	2.985	54.831
	22	20.611
	14.748	12.212
	11.301	14.253
	16.939	50
	32.917	33.547
	22.868	25.309
	17.051	13.495
	0.699	33.333
	13.212	27.056
	14.085	32.422
	32.412	5.804
	7.675	48.264
	12.895	40.836
	6.473	15.528
	17.029	80.734
	18.062	13.542
	8.374	7.569
	2.535	40.308
	11.709	50.402
	0.787	40.045
	4.023	93.554
	11.782	46.528
	36.164	92.593
	7.31	59.766
	41.087	12.5
	6.161	92.308
	19.431	17.593
	16.514	19.704
	12.088	50.778
	16.216	88.971
	16.667	3.184
	5.157	40.075
	8.155	59.483
	13.455	38.587
	18.095
	2.941	8.458
	14	97.991
	7.834	7.556
	4.822	49.718
	0.857	24.893
	9.954	8.824
	3.827	4.605
	8.684	53.32
	29.567	19.431
	2.284	54.567
	9.184	30.695
	3.878	57.942
	22.098	16.342
	8.04	41.827
	17.284	60.174
	1.667	72.532
	21.655	36.099
	19.159	13.158
	11.979	32.072
	18.386	20.085
	4.948	23.889
	16.435	8.242
	20.37	20.968
	6.044	19.283
	13.918	67.625
	2.262	36.854
	25.114	17.943
	18.132	21.616
	4.132	83.906
	14.246	2.434
	10.547	15.306
	13.953	14.888
	25.632	16.953
	19.529	19.96
	17.17	11.934
	0.652	26.744
	9.535	27.959
	30.806	35.211
	31.186	20.392
	13.077	54.819
	4.229	14.474
	14.851	27.974
	8.374	3.846
	7.121	18.085
	12.937	14.938
	28.08	12.611
	6.599	83.876
	42.786	83.612
	14.84	33.667
	14.972	86.019
	15.809	52.686
	16.883	6.118
	6.763	25.84
	16.564	8.372
	14.346	13.75
	20.05	1.483
	11.48	4.545
	18.158
	9.143	42.137
	24.314	35.169
	12.169	46.481
	10.591	67.755
	3.927	20.642
	9.593	42.081
	17	71.93
	16.461	71.088
	19.476	46.862
	15.714	86.94
	5.714	18.905
	35.955	18.129
	18.508	25
	16.901	22.12
	13.158	91.393
	4.484	83.237
	16.038	87.209
	61.301	71.784
	18.127
	12.062	41.603
	19.905	70.502
	25.667	93.099
	2.752	76.562
	9.195	35
	21.507	78.779
	20.833	66.39
	16.337	45.031
	7.773	77.124
	4.739	42.331
	12.5	26.075
	15.476	58.52
	6.868	46.818
	9.363	14.674
	16.597	38.542
	22.121	23.358
	15.909	58.108
	20.563	34.17
	15.92	39.431
	30.493	22.488
	29.322	87.066
	5.046	29.577
	25.904	91.81
	3.617	24.675
	19.886	87.931
	8.293	23.661
	1.449	53.07
	24.595	33.696
	15.678	45.318
	10.142
	27.386	2.745
	1.915	33.796
	18.667	6.198
	9.302	36.175
	4.167	6.624
	19.401	62.987
	16.432	19.095
	18.307	26.364
	14.13	51.462
	14.286	30.583
	18.672	43.75
	3.125	24.359
	20.721	11.732
	15.035	13.119
	29.04	22.959
	15.385	26.835
	16.932	20.217
	8.723	39.267
	7.24	21.394
	16.237	24.561
	25.485	12.694
	11.538	37.234
	9.429	70.876
	19.66	17.065
	26.684	9.773
	4.847	23.291
	40.674	17.179
	12.215	16.667
	16.299	18.5
	10.05	9.659
	25.862	93.317
	22.606	13.802
	15.297	59.483
	13.441	51.777
	35.641	83.46
	18.182	37.054
	25.566	33.239
	39.216	34.565
	7.576	55.243
	36.395	23.352
	31.407	57.102
	14.468	29.098
	4.229	59.959
	33.392	34.737
	4.31	23.849
	26.25	28.191
	6.014	41.525
	38.418	28
	8.368	35.687
	6.219	29.167
	8.738	37.583
	9.091	40.476
	20.968	12.772
		26.554
	13.311	21.461
	20.714	73.946
	6.213	27
	9.111	28.512
	36.082	15.25
	22.067	36.095
	17.532	29.558
	22.403	10.904
	15.027	32.039
	25.852	90.891
	4.464	23.034
	38.533	29.193
	26.894
	24.75	23.651
	1.523	61.111
	14.209	19.898
	21.404	48.182
	19.582	72.614
	9.275	30.531
	0.752	75.115
	3.736	50.279
	19.251	21.336
	3.862	60.435
	9.244	14.286
	21.316	9.034
	0.671	20.25
	18.636	10.413
	22.407	34.767
	13.3	11.268
	11.378	28.478
	24.883	88.492
	18.371	3.965
	23.39	18.367
	30.238	36.215
	14.773	25.118
	39.267	2.532
	24.755	20.619
	4.128	4.772
	17.457	22.479
	25.909	1.301
	15.596	13.853
	16.889	35.177
	30.804	12.615
	20.872	11.111
	12.383	26.042
	28.738	61.29
	5	42.246
	8.516	13.564
	18.627	6.445
	26.961	62.162
	28.041	9.859
	27.83	52
	8.911	71.939
	18.44	50.408
	16.901	32
	11.905	2.51
	13.158	26.884
	32.339	12.5
	7.373	23.438
	0.644	37.192
	13.131	26.014
	5.376	30.22
	40.755
	13.712	3.769
	9.845	51.786
	22.545	27.754
	0.197	46.825
	19.598	50.206
	6.485	25.581
	9.132	46.328
	16.043	27.5
	4.673	8.24
	7.773	34.615
	18.713	12.558
	1.681	34.659
	0	21.707
	26.214	45.928
	13.429	77.523
	17.262	4.785
	10.93	49.697
	21.528	43.557
	38.095	42.365
	13.636	58.52
	29.88	24.631
	21.814	52.473
	27.189	10
	23.46	63.027
	3.807	55.916
	13.212	79.004
	36.638	7.175
	7.08	67.2
	19.368	43.878
	28.066	98.996
	0.721	28.782
	3.902	83.742
	22.589	28.796
	24.265	17.299
	7.175	45.07
	3.061	22.821
	4.076	62.288
	24.332	72.022
	1.626	12.897
	10.526	25.486
	13.538	47.126
	8.566	68.406
	7.831	42.381
	14	32.927
	9.512	24.865
	25.087	33.631
	23.209	18.611
	4.95	98.879
	5	15.157
	15.756	17.917
	16.587	13.793
	15.962	11.574
	17.114	17.131
	42.368	56.835
	8.072	40.102
	17.98	61.806
	2.82	14.362
	9.302	33.198
	1.681	31.937
	7.667	28.537
	4.826	21.739
	18.293	17.442
	6.364	34.476
	18.137	9.848
	15.991	4.885
	4.089	43.564
	12.326	22.887
	6.373	12.333
	13.673	12.207
	16.597	55.263
	13.816	13.81
	3.435	11.024
	16.667	39.401
	5.932
	11.682	24.229
	4.545	42.584
	16.667	10.887
	12.718	24.4
	8.553	40.204
	1.23	69.42
	44.34	32.184
	19.811	44.976
	2.535	44.118
	37.234	57.261
	20.465	51.389
	1.502	27.021
	12.555	64.957
	4.188	30.637
	10.95	26.179
	1.383	56.286
	10.778	40.845
	12.397	95.363
	15.462	19.333
	8.403	64.48
	4.772	19.663
	10.28	37.165
	16.809	63.679
	14.74	64.619
	20.833	74.429
	14.474	13.359
	7.519	53.052
	6.89	6.391
	0.893	15.306
	4.646	39.734
	10.406	28.417
	27.576	14.865
	23.105	15.652
	12.5	65.89
	22	33.259
	8.298	21.889
	10.448	19.259
	18.273	15.668
	5.58	8.266
	4.293	18.391
	3.987	11.993
	1.092	40
	2.128	41.522
	10.93	35.961
	13.663	22.727
	14.807	25.789
	29.026	24.099
	14.048	7.224
	4.042	19.853
	10.684	41.7
	4.717	10.766
	12.611
	0.212	35.636
	4.032	34.709
	3.972	22.128
	22.193	4.118
	0	52.226
	4.028	40.714
	16.667	12.432
	4.83	60.329
	6.757	63.19
	6.299	48.259
	25.229	31.795
	0.427	39.301
	0.229	87.736
	2.727	69.188
	2.301	93.945
	0.316	59.692
	10.648	53.292
	0.289	34.457
	9.714	74.672
	2.059	36.127
	10.488	83.243
	0.847	64.198
	7.642	81.712
	0.402	19.89
	5.417	55
	2.381	53.394
	0	25.843
	7.325	13.397
	1.23	40.734
	9.108	12.791
	2.058	31.944
	8.486	29.459
	7.85	19.742
	8.475	30.078
	6.091	33.966
	5.66	16.337
	0	18.4
	10	28.771
	0.446	14.359
	16.01	90.036
	4.505	42.128
	3.349	14.938
	0.593	16.807
	17.342
	4.19
	3.095
	24.757
	13.518
	3.261
	19.209
	7.851
	19.274
	1.633
	19.907
	3.417
	0
	17.822
	8.765
	8.216
	17.876
	1.059
	18.116

## Sheet: Fig. 2F
PCNT	Nuclear envleope coverage [%]
	mScarlet	MYOG-mScarlet
	0	30.366
	1.274	23.243
	11.582	80.367
	0	35.372
	10.697	8.531
	6.419	24.183
	0	24.405
	0	39.521
	0	56.364
	3.315	65.347
	3.828	30.829
	0	19.624
	0.276	54.404
	19.663	21.244
	0	15.682
	0	13
	0	50.254
	2.674	59.868
	9.346	30.455
	0	69.742
	0	31.633
	2.128	5.25
	3.374	36.878
	14.124	16.129
	0	13.056
	5.396	27.913
	0	42.647
	3.293	49.754
	4	31
	8.163	14.286
	0	38.785
	0.962	22.961
	6.461	18.782
	7.48	20.293
	6.72	27.572
	0	16.284
	0	62.977
	0	63.176
	1.899	40.521
	34.713	33.582
	0	57.207
	5.306
	0	0.943
	9.119	17.674
	4.737	9.249
	0	17.628
	5.738	1.042
	14.162	23.593
	0	0
	0	13.27
	4.885	20.794
	0.833	9.827
	3.333	17.662
	11.745	25.786
	8.777	5.093
	7.055	15.897
	2.463	9.836
	10.278	27.247
	6.024	7.853
	4.918	20.75
	10.736	33.962
	6.216	7.25
	0.813	6.213
	0	6.477
	0	8.547
	1.412	10.849
	0	11.471
	7.711	15.207
	0	16.279
	0.24	20.466
	0	22.558
	2.242	7.764
	5.072	14.591
	10.674	26.562
	2.415	36.713
	1.445	14.444
	7.143	0
	8.974	8.766
	0	18.408
	0	5.851
	0	10.27
	0	29.189
	9.893	9.447
	6.868	0
	8.523	4.852
	6.333	13.793
	0	29.688
	15.094
	7.474	36.719
	10.417	22.045
	0	42.368
	3.005	55.819
	0	62.619
	2.614	52.743
	11.184	65.104
	0.625	62.097
	5.526	52.094
	6.604	72.906
	0.249	60.185
	2.139	46.691
	6.707	24.528
	8.889	58.222
	8.824	65.294
	9.155	9
	9.568	24.29
	8.421
	6.959	8.252
	8.527	50.761
	4.73	36.458
	10.833	52.874
	6.291	45.833
	1.145	43.673
	13.125	60.976
	0	31.548
	3.125	17.473
	11.264	35.152
	0	22.034
	0	21.296
	1.685	43.132
	2.532	33.52
	0	19.487
	10.119	51.604
	5.276	60.204
	0	3.191
	14.157	28.528
	8.639	22.251
	0	64.667
	6.383	13.291
	0	19.748
	14.773	57.059
	10.417
	14.201	0
	1.235	58.108
	3.736	16.986
	7.812	23.284
	0	39.175
	5.625	29.009
	0	54.072
	0	33.85
	5.556	3.636
	6.389	20.382
	0	16.552
	4.412	11.471
	7.857	23.684
	5.06	23.669
	4.737	20.112
	0	26.108
	0	10.05
	4.098	9.322
	2.994	43.111
		13.959
	14.754	17.164
	9.748	36.735
	6.509	5.155
	4.276	6.061
	15.909	19.744
	2.308	14.502
	2.367
	5.594	33.575
	0	55.808
	0	13.3
	15.385	31.865
	0	41.753
	3.642	38.95
	3.416	5.34
	8.599	30.435
	8.599	44.444
	8.94	31.921
	9.945	20.588
	0.882	47.4
	0	8.158
	4.118	24.138
	0	33.705
	16.562	31.481
	4.934	0
	0	49.699
	11.264	15.7
	0.298	17.722
	7.432	15.591
	7.54	33.553
	9.234	22.283
	8.901	48.284
	0.709
	2.846	50.358
	6.04	23.939
	9.559	54.396
	0	48
	11.917	21.93
	12.791	14.338
	0	35.825
	0	39.444
	9.353	14.124
	1	30.963
	7.36	33.246
	0	29.899
	8.867	25.373
	12.5	53.261
	1.689	8.936
	5.455	36.688
	5.303	0.543
	10.345	15.258
	0	1.878
	7.188	30.102
	6.364	32.321
	5.215	32.237
	0	35.795
	12.179	45
	0.922	30.495
	3.595	22.941
	0	20.2
	7.838	16.751
	1.087	47.012
	8.696	33.575
	6.762	39.855
	4.545	37.651
	0	25.134
	4.908	20.95
	9	15.5
	4.365	22.152
	6.711	9.211
	11.017	34.615
	8.168	49.709
	7.237	32.292
	7.993	49.735
	5.909	9.239
	5.198	38.333
	5.882
	9.314	27.5
	8.28	30.75
	5.621	28.44
	5.25	21.939
	2.874	25.648
	1.007	26.203
	1.071	2.448
	3.947	18.814
	0	34.278
	1.327	26.702
	1.944	83.5
	0.585	13.347
	7.229	28.316
	8.96	16.763
	9.943	23.632
	9.247	24.257
	2.19	44.5
	13.836	31.01
	1.515	26.157
	0.581	40.796
		36.126
	7.258	18.182
	0	24.39
	4.573	10.541
	3.636	25.926
	3.313	16.667
	3.977	17.836
	7.5	51.471
	2.895	26.724
	1.379	18.293
	0	44.802
	3.214	19.538
	8.125	37.783
	2.448	40.066
	4.667	19.318
	5.96	44.608
	7.738	1.149
	9.603	24.519
	3.145	47.166
	0.513	5.388
	2.5	7.672
	0	16.512
	0.347	42.623
	0	14.554
	10.138	6.897
	0.529	32.216
	0	23.892
	3.012	63.986
	11.176
	0	15.323
	4.636	8.667
	0.321	9.951
	2.215	6.641
	7.692	9.441
	6.952	22.826
	2.825	12.431
	0	15.476
	11.709	10.622
	1.534	8.576
	15.847	28.719
	1.25	13.506
	14.724	10.968
	6.338	46.934
	0	26.44
	4.751	20.588
	9.441	13.953
	6.183	0
	0	11.892
	0	27.317
	1.813	10.326
	0	17.378
	0	18.436
	6.081	26.099
	8.092	7.071
	9.694	16.409
	0.325	7.524
	9.006	10.526
	7.225	20.062
	15.244	0
	0	12.037
	0	8.777
	0.273	23.923
	7.031	4.52
	0	37.361
	3.602	14.888
	3.385	47.315
	0	2.21
	0	18.785
	0	17.784
	9.429	19.459
	12.798	2.683
	6.774	18.627
	3.293	18.306
	2.976	26.768
	12.893	18.595
	2.397	9.585
	0	0
	9.04	12.927
	0	13.393
	3.009	3.98
	5.263	13.542
	9.626	7.547
	2.186	17.143
	8.146
	0	35.049
	0	63.077
	0.338	16.97
	0	32.8
	5	22.388
	8.743	35.025
	2.123	33.889
	5.667	45.946
	0.82	11.622
	1.33	53.886
	0	55.854
	7.647	53.727
	13.929	56.127
	6.183	21.123
	10.234	24.878
	4.375	35.223
	2.174	22.955
	10.18	33.79
	4.412	7.672
	3.398	29.134
	2.286	8.696
	2.332	5.87
	0	21.547
	3.846	32.683
	0.309	12.972
	1.17
	3.595
	8.671
	11.012
	0
	10.256
	5.634
	2.837
	6.886
	5.275
	1.734
	6.349
	4.651
	0.287
	4.688
	1.143
	3.846
	8.681
	1.418
	0
	4.762
	10.352
	4.487
	7.658
	2.927
	7.278
	2.296
	2.795
	0
	0
	0
	1.667
	0
	5.053
	1.724
	10.075
	0
	8.58
	7.672
	0
	0
	0.904
	3.017
	2.941
	7.752
	7.062
	11.364
	0
	2.976
	0
	8.252
	10.119
	14.894
	5.449
	0
	6.494
	5.628
	12.634
	0.279
	3.801
	10.185
	10.294
	0
	8.871
	4.321
	1.554
	1.049
	0.613
	9.701
	7.669
	2.679
	1.046
	0.323
	10.465
	8.661
	0
	0
	10.504
	6.461
	1.974
	0
	0
	8.84
	5.828
	7.622
	7.071
	0
	17.059
	7.812
	6.962
	4.027
	8.649
	0
	9.295
	0
	0
	11.635
	7.022
	11.19
	1.136
	5.988
	0
	8.511
	1
	4.699
	0
	13.907
	9.701
	0.857
	3.279
	0
	0
	9.127
	0.4
	5.975
	8.631
	7.513
	7.363
	5.212
	1.676
	10.135
	1.181
	8.611
	1.015
	0
	0
	3.797
	0.524
	12.805
	0
	0
	0
	1.124
	5.707
	6.793
	8.495
	5.707
	0
	10.109
	8.989
	7.012
	0
	8
	8.777
	0
	0
	17.15
	2.788
	1.961
	5
	3.147
	0.311
	5.159
	0
	5.769
	4.601
	0
	0
	0
	3.556
	5.797
	6.145
	11.386
	2.273
	4.521
	4.255
	8.553
	10.828
	2.134
	8.562
	0
	0
	0
	0
	2.027
	5.864
	5.556
	8.042
	6.41
	23.776
	0.287
	4.724
	15.439
	5.039
	0
	14.015
	5.882
	4.511
	14.621
	0
	4.779
	9.929
	1.807
	2.439
	12.416
	13.021
	13.522
	8.667
	14.516
	8.392
	7.542
	3.459
	4.962
	11.513
	9.036
	0
	0.273
	8.036
	9.15
	3.285
	7.095
	8.14
	7.554
	0
	11.066
	8.228
	0.267
	0
	5.085
	16.549
	6.159
	0
	0
	0.893
	0.296
	0
	4.575
	6
	19.251
	8.824
	9.14
	1.238
	0
	6.027
	5.588
	6.289
	1.064
	0
	2.899
	11.616
	0
	4.722
	6.216
	4.918
	3.488
	0
	12.286
	11.635
	10.355
	5.263
	1.596
	5.621
	1
	4.046
	6.818
	3.378
	2.047
	0
	7.667
	2
	5
	5.66
	0
	3.719
	15.741
	9.322
	19.527
	7.566
	9.296
	0
	7.377
	0
	8.434
	13.527
	6.818
	7.278
	14.198
	4.121
	11.194
	3.226
	5.502
	11.137
	13.587
	11.111
	2.344
	0
	4.194
	13.663
	10.561
	2.778
	9.091
	4.196
	6.358
	8.065
	4.054
	8.854
	0
	17.602
	4.478
	2.299
	6.618
	16.667
	8.759
	0.226
	0
	12.931
	0
	0
	1.509
	0.282
	6.97
	0
	11.364
	4.438
	0
	6.855
	2.143
	6.135
	8.516
	10.778
	6.502
	9.827
	10.976
	0
	9.036
	5.28
	0.338
	8.947
	5.682
	24.561
	1.307
	15.436
	0
	1.572
	8.981
	7.986
	7.561
	5.899
	7.047
	4.737
	8.841
	13.907
	7.566
	18.198
	27.545
	5.291
	8.854
	0
	6.649
	0
	3.216
	9.756
	9.569
	0
	3.941
	3.233
	6.318
	2.747
	0
	5.464
	5.556
	0
	4.651
	0
	0
	6.587
	0
	0
	8.17
	4.783
	0
	7.708
	6.965
	1.079
	1.754
	7.436
	2.035
	0.824
	0.746
	5.233
	3.788
	4.974
	8.333
	0
	0
	0.307
	0
	4.861
	5.693
	0
	0
	0.228
	6.688
	2.5
	7.143
	17.898
	0
	0
	7.474
	5
	9.091
	0
	7.362
	13.11
	10.149
	5.469
	0
	1.42
	0
	5.28
	6.081
	0
	8.333
	6.486
	14.286
	0.8
	3.968
	0
	12.26
	0.368
	0
	0.711
	0
	0
	8.649
	0
	0.518
	9.333
	0
	0
	0
	0.625
	0
	11.243
	6.28
	9.744
	13.918
	0
	0.881
	4.802
	8.545
	2.89
	4.902
	7.554
	0
	6.452
	12.727
	9.816
	9.589
	4.225
	8.38
	8.168
	1.449
	0
	3.481
	5.769
	2.899
	9.737
	4.965
	2.564
	6.818
	1.103
	12.304
	2.158
	18.981
	0
	2.581
	7.062
	7.442
	14.474
	0
	0
	1.582
	0
	9.605
	0.735
	8.738
	2.448
	0.872
	5
	8.889
	11.813
	2.045
	7.047
	2.381
	0.752
	1.804
	6.725
	9.884
	4.948
	0
	7.729
	0.559
	6.989
	6.643
	13.065
	0.709
	1.974
	11.963
	0
	5.848
	8.974
	0
	1.307
	0
	9.615
	11.517
	0
	3.269
	7.986
	4.545
	2.273
	3.988
	4.217
	4.028
	0
	8.47
	3.333
	0
	20.472
	14.08
	1.538
	9.172
	13.758
	11
	8.943
	8.192
	5.96
	3.977
	13.861
	5.689
	11.151
	23.193
	8.871
	5.263
	9.375
	6.832
	2.174
	0
	9.862
	7.895
	0.98
	2.041
	0
	0.943
	7.91
	6.886
	20.886
	1.934
	0
	10.897
	12.567
	2.147
	2.812
	8.556
	9.938
	11.779
	6.294
	2.062
	7.143
	9.506
	10
	13.614
	1.823
	3.371
	0.397
	1.316
	13.102
	6.849
	0
	0.526
	11.039
	10.544
	8.446
	8.671
	1.852
	7.874
	18.605
	4.242
	9.239
	15.084
	13.208
	5.916
	0
	5.303
	2.096
	10
	2.273
	4.545
	0
	11.23
	10.591
	4.294
	0
	4.813
	5.833
	0
	6.579
	6.704
	7.28
	6.395
	15.506
	11.429
	9.737
	0
	0
	5.825
	8.421
	9.677
	1.345
	13.699
	7.632
	5.208
	9.627
	0
	2.709
	0
	4.403
	0
	0.636
	4.924
	10.052
	0
	4.737
	0.727
	0.379
	10.947
	6.569
	2.957
	0
	3.538
	6.983
	0
	14.628
	0
	14.871
	4.634
	2.717
	6.25
	28.947
	9.124
	5.484
	7.988
	0.649
	0
	0
	0.787
	9.459
	2.326
	8.424
	0
	4.545
	0
	0
	3.009
	0.24
	5.159
	0
	10.766
	4.678
	8.633
	3.571
	6.667
	0
	4.38
	3.793
	12.376
	1.087
	0.248
	6.536
	8.621
	0
	9.709
	3.642
	0
	0
	0.35
	9.929
	0
	10.057
	0.82
	3.311
	2.473
	6.284
	0
	0
	2.514
	6.25
	11.012
	0
	2.857
	4.911
	10.432
	9.605
	0
	4.225
	6.051
	0
	0
	9.714
	0
	0.658
	0
	0.336
	6.739
	0
	14.773
	0
	2.727
	5.932
	1.667
	1.042
	3.084
	2.874
	0
	0.916
	0
	0.606
	0
	0
	0
	4.487
	5.204
	6.213
	1.592
	6.954
	9.836
	7.86
	0.898
	1.232
	9.355
	5.986
	9.006
	5.696
	6.117
	12.298
	0
	0.314
	0
	15.741
	7.105
	6.875
	0
	0.838
	9.322
	0
	15.385
	13.473
	2.28
	2.469
	7.143
	7.764
	3.516
	4.645
	6.597
	6.442
	0
	2.866
	0
	4.636
	0
	0
	3.521
	25.305
	4.468
	4.138
	12.093
	15.487
	0
	4.955
	2.397
	5.966
	0
	0
	4.491
	2
	3.448
	4.348
	10.584
	0
	4.851
	1.42
	0
	1.894
	6.291
	0.294
	3.555
	6.593
	20.115
	0
	0
	9.091
	8.844
	13.285
	4.365
	2.571
	0
	0
	3.514
	3.505
	6.757
	6.286
	0
	14.525
	0
	7.059
	0
	2.721
	9.896
	5.585
	0
	7.432
	7.865
	8.291
	1.203
	1.678
	8.235
	6.398
	3.571
	2.926
	4.42
	6.977
	0.568
	5.742
	1.325
	5.195
	0
	0
	2.837
	0.617
	8.451

## Sheet: Fig. 2H
AKAP9	Nuclear envleope coverage [%]
	mScarlet	MYOG-mScarlet
	1.539	9.205
	5.119	6.533
	1.114	6.685
	1.817	9.48
	3.513	2.695
	1.662	5.631
	5.106	1.495
	2.249	21.449
	3.274	5.78
	5.049
	4.35	7.94
	2.364	8.69
	1.123	1.409
	1.964	2.524
		21.491
	0.894	0.976
	2.6	1.402
	0.772	1.377
	2.184	4.954
	2.892	3.463
	3.384
	2.067	0.942
	2.892	7.72
	1.303	3.75
	1.008	1.324
	2.549	6.265
	2.784	5.197
	0.253	0.39
	0.86	0.893
	5.227	5.571
	1.157	3.818
	8.653	0.961
	5.14	1.123
	0.477	1.196
	1.793	2.358
	1.813	4.238
	6.447	0.494
	3.331	22.181
	0.463	2.042
	7.082	7.255
	0.621	13.822
	3.883
	1.421	2.648
	1.446	2.541
	2.035	12.102
	0.763	2.382
	6.779	0.86
	0.695	2.936
	2.255	5.574
	4.488	3.317
	1.628	1.935
	1.727	0.969
	1.256	4.396
		2.344
	1.262
	0.935	6.381
	1.568	4.809
	1.549	1.321
	0.143	5.046
	1.042	3.122
	1.248	4.551
	0.124	3.441
	1.382	8.4
	5.2	12.496
	3.126	5.626
	4.631	9.564
	3.633
	6.725	1.238
	0.054	2.479
	0.332	0.371
	0.315	0.214
	2.221	40.823
	3.839	4.962
	2.263	5.679
	1.262	2.155
	4.565	1.207
	1.374	6.864
		2.942
	3.769	1.468
	0.351	2.783
	1.666	15.497
	0.297	6.393
	1.437	1.135
	1.545
	0.981	2.474
	0.736	17.531
	3.131	1.322
	5.458	2.6
	4.016	5.393
	6.853	3.233
	1.262	4.932
	0.935	1.815
	1.568	4.853
	1.549
	0.143	2.006
	1.042	5.96
	1.248	1.14
	0.124	7.967
	1.382	6.133
	5.2	2.543
	3.126	4.339
	4.631	3.717
	3.633	2.472
	6.725	1.837
	0.054	2.576
	0.332	3.572
	0.315	6.776
	2.221	2.886
	3.839	2.776
	2.263	23.876
	1.262	5.753
	4.565
	1.374	1.915
		0.4
	3.769	1.383
	0.351	1.25
	1.666	0.3
	0.297	4.511
	1.437	6.595
	1.545	0.491
	0.981	1.063
	0.736	0.468
	3.131	1.517
	5.458	7.94
	4.016	8.69
	6.853	1.409
	1.539	2.524
	5.119	21.491
	1.114	0.976
	1.817	1.402
	3.513	1.377
	1.662	4.954
	5.106	3.463
	2.249	5.78
	3.274
	5.049
	4.35
	2.364
	1.123
	1.964
		2.598
	0.894	27.338
	2.6	9.205
	0.772	6.533
	2.184	6.685
	2.892	9.48
	3.384	2.695
	2.067	5.631
	2.892	1.495
	1.303	21.449
	1.008	5.78
	2.549	5.197
	2.784	0.39
	0.253	0.893
	0.86	5.571
	5.227	3.818
	1.157	0.961
	8.653	1.123
	5.14	1.196
	0.477	2.358
	1.793	4.238
	1.813
		0.494
	6.447	22.181
	3.331	2.042
	0.463	7.255
	7.082	13.822
	0.621
	3.883	2.648
	1.421	2.541
	1.446	12.102
	2.035	2.382
	0.763	0.86
	6.779	2.936
	0.695	5.574
	2.255	3.317
	4.488	1.935
	1.628	0.969
	1.727	4.396
	1.256	2.344
	0.894
	2.6	6.381
	0.772	4.809
	2.184	1.321
	2.892	5.046
	3.384	3.122
	2.067	4.551
	2.892	3.441
	1.303	8.4
	1.008	12.496
	2.549	5.626
	2.784	9.564
	0.253
	0.86	1.238
	5.227	2.479
	1.157	0.371
	8.653	0.214
	5.14	40.823
	0.477	4.962
	1.793	5.679
	1.813	2.155
	3.769	1.207
	0.351	6.864
	1.666	2.942
	0.297	1.468
	1.437	2.783
	1.545	15.497
	0.981	6.393
	0.736	1.135
	3.131
	5.458	2.474
	4.016	17.531
	6.853	1.322
	1.262	2.6
	0.935	5.393
	1.568	3.233
	1.549	4.932
	0.143	1.815
	1.042	4.853
	1.248
	0.124	2.006
	1.382	5.96
	5.2	1.14
	3.126	7.967
	4.631	6.133
	3.633	2.543
	6.725	4.339
	1.539	3.717
	5.119	2.472
	1.114	1.837
	1.817	2.576
	3.513	3.572
	1.662	6.776
	5.106	2.886
	2.249	2.776
	3.274	23.876
	5.049	5.753
	4.35
	2.364	1.915
	1.123	0.4
	1.964	1.383
		1.25
	0.894	0.3
	2.6	4.511
	0.772	6.595
	2.184	0.491
	2.892	1.063
	3.384	0.468
	2.067	1.517
	2.892	2.598
	1.303	27.338
	1.008	1.238
	2.549	2.479
	2.784	0.371
	0.253	0.214
	0.86	40.823
	5.227	4.962
	1.157	5.679
	8.653	2.155
	5.14	1.207
	0.477	6.864
	1.793	2.942
	1.813	1.468
		2.783
	6.447	15.497
	3.331	6.393
	0.463	1.135
	7.082
	0.621	2.474
	3.883	17.531
	1.421	1.322
	1.446	2.6
	2.035	5.393
	0.763	3.233
	6.779	4.932
	0.695	1.815
	2.255	4.853
	4.488
	1.628	2.006
	1.727	5.96
	1.256	1.14
		7.967
	1.262	6.133
	0.935	2.543
	1.568	4.339
	1.549	3.717
	0.143	2.472
	1.042	1.837
	1.248	2.576
	0.124	3.572
	1.382	6.776
	5.2	2.886
	3.126	2.776
	4.631	23.876
	3.633	5.753
	6.725
	0.054	1.915
	0.332	0.4
	0.315	1.383
	2.221	1.25
	3.839	0.3
	2.263	4.511
	1.262	6.595
	4.565	0.491
	1.374	1.063
		0.468
	3.769	1.517
	0.351	2.598
	1.666	27.338
	0.297	9.205
	1.437	6.533
	1.545	6.685
	0.981	9.48
	0.736	2.695
	3.131	5.631
	5.458	1.495
	4.016	21.449
	6.853	5.78
	1.262
	0.935	7.94
	1.568	8.69
	1.549	1.409
	0.143	2.524
	1.042	21.491
	1.248	0.976
	0.124	1.402
	1.382	1.377
	5.2	4.954
	3.126	3.463
	4.631
	3.633
	6.725
