# Supplementary material for: Myogenin controls via AKAP6 non-centrosomal microtubule-organizing center formation at the nuclear envelope
Source: eLife. 2021 Oct 4;10:e65672. doi: 10.7554/eLife.65672 (PMC8523159; doi:10.7554/eLife.65672)
Supplement: Figure 3—source data 1. [file elife-65672-fig3-data1.xlsx]

## Sheet: Fig. 3B
PCNT	centrosome intensity [a.u.]
	mScarlet	MYOG-mScarlet
	75.514	41.892
	40.541	31.865
	92.405	22.757
	58.27	44.865
	73.189	108.118
	43.595	77.054
	30.973	60.351
	65.73	33.892
	70.378	31.865
	45.784	71.676
	59.324	55.649
	53.541	54.784
	33.324	21.108
	66.297	32.946
	49.297	36.054
	75.676	6.324
	128.324	14.568
	59.73	26.703
	69.541	21.622
	39.054	54.703
	74.405	34.378
	73.649	71.135
	168.973	56.189
	64.189	117.27
	76.081	51.324
	55.892	23.324
	31.135	19.027
	62.324	38.108
	21.243	42.784
	75.514	33.27
	86.541	29.027
	98.568	21.378
	133.649	37.541
	83.757	17.135
	112.27	13.649
	52.324	22.324
	135.324	32.027
	47.108	41.189
	77.784	19.405
	95.405	30.27
	76.514	16.676
	29.703	39.108
	57.432	29.405
	44.351	25.189
	26.838	33
	65.243	44.189
	46.297	47.054
	76.703	21.027
	55.054	31.162
	70.027	24.541
	40.027	27.081
	86.108	41.595
	55.865	22.622
	52.459	33.919
	55.811	43.189
	57	21.324
	50.135	26.73
	31.351	16.541
	26.081	41.811
	47.459	14.838
	30.081	31.703
	41.703	23.432
	50.054	43.514
	83.189	18.73
	52.189	22.297
	76.081	23.838
	55.081	25.432
	40.811	23.486
	43.405	24.243
	30.541	16.189
	62.649	21.838
	26.135	32.432
	33.514	14.054
	53.324	16.486
	36.324	16.486
	34.351	13.405
	49.351	22.054
	3.378	14.757
	28.324	12
	47.595	28.243
	13.405	12.027
	17.946	13.703
	48.108	28.459
	41.703	13.811
	42.108	28.973
	116.189	15.486
	44.378	22.919
	57.405	31.703
	63.514	7.541
	39.324	18
	49.162	6.189
	32.135	15.432
	24.811	17.297
	21.324	23.351
	31.486	13.892
	62.243	9.73
	39.649	13.622
	72.297	18.622
	32.054	17.595
	35.324	17.432
	29.946	10.946
	34.189	25.459
	29.27	8.297
	27.676	15.784
	30.676	12.568
	50.405	20.297
	8.784	23.514
	17.541	6.649
	16.216	15.811
	42.568	6.865
	34.135	6.811
	21.459	9.216
	31.73	22.216
	41.054	11.189
	32.351	6.649
	22.73	9.027
	45.919	18.297
	5.73	13.757
	18.703	9.216
	3.568	21.514
	18.622	10.919
	26.514	22.973
	50.135	13.162
	37.459	10.351
	20.189	13.216
	29.838	10.784
	40.378	11.649
	15.324	6.595
	23.784	12.622
	34.757	5.432
	11.378	13.541
	18.892	13.243
	14.405	10.676
	13.459	17.946
	5.892	13.865
	4.216	22.865
	4.027	13.514
	3.486	11.459
	3.73	11.27
		10.919
	112.432	9.703
	45.405	7.595
	50.649	9.027
	31.541	5.703
	67.297	11.351
	66.027	9.757
	40.27	8.568
	55.351	10.216
	81.703	18.486
	111.838	8.73
	99.622	8.486
	76.622	10.568
	74.351	12.757
	47.054	6.622
	83.73	14.865
	85.135	14.486
	157.757	7.811
	66.514	7.297
	59.459	17.081
	28.703	11.27
	26.216	12.135
	28.459	9.189
	113.676	10.73
	60.892	14.297
	78.297	9.162
	30.216	15.865
	33.568	10.378
	81.243	9.135
	59.757	7.73
	90.946	8
	125.27	13
	86.378	12.324
	67.568	10.324
	64.946	12.757
	68.676	6.73
	83.811	5.676
	109.27	10.649
	26.351	8.622
	78.216	6.676
	19.405	11.486
	41.216	9.838
	49.676	8.919
	26.973	11.946
	68.189	13.081
	66.595	6.162
	41.432	6.378
	64.432	9.135
	50.486	8.054
	37.838	14.135
	61.865	11.865
	67.135	8.108
	41.432	7.081
	52.162	8.081
	40.351	4.27
	67.27	7.973
	22.162	10.676
	70.838	12.595
	25.216	7.73
	63.459	7.378
	21.405	6.649
	32.378	9.027
	37.486	7.378
	44.568	9.276
	43.081	7.027
	45.27	8.595
	30.919	6.73
	52.865	14.811
	21.027	10.946
	39.973	9.811
	71.676	15.108
	56.378	6.378
	49.378	10.784
	58.568	8.759
	58.568	6.676
	48.568	6.757
	23.243	7.243
	27.919	12.324
	37.622	5.486
	46.568	9.919
	60.378	7.054
	18.703	10.486
	44.081	10.892
	51.243	6.081
	34	5.946
	41.162	5.973
	36.838	5.405
	47.595	11.892
	37.757	5.73
	24.054	19.162
	15.459	10.568
	3.757	4.514
	52.432	5.108
	58.135	7.054
	70.784	6.189
	22.649
	51.541	42.757
	82.757	31.757
	40.459	109.297
	17.622	146.865
	24.703	79.081
	36.189	39.757
	28.676	36.649
	31.297	66.649
	30.568	26.568
	30.351	12.135
	25.081	20.054
	4.243	12.676
	33.757	53.676
	33.069	58.514
	27.676	21.351
	19.108	43.243
	29.676	24.919
	23.054	24.135
	18.649	39.135
	90.676	50.838
	11.216	26.703
	38.865	11.162
	46.135	38.757
	10.297	20.162
	10.595	34.649
	44.622	11.135
	33.351	12.027
	20.081	47.135
	26.919	13.486
	32.703	18.649
	12.27	13.757
	59.297	22.108
	31.378	18.189
	26.676	16.568
	21.405	13.486
	20.216	10.946
	13.622	19.459
	34.703	18.649
	17.486	13.784
	3.514	10.514
	34.838	18.027
	21.27	7.541
	4.243	11.622
	28.892	19.811
	14.649	22.162
	32.162	23.081
	7.216	16.892
	11.757	17.243
	8.108	31.595
	3.459	15.649
	5.946	23.189
	3.432	41.919
	3.432	13.811
		10.541
	21.757	15.216
	44.514	18.595
	127.946	10.865
	110.108	8.459
	114.568	10.703
	80.216	16.432
	56.946	8.838
	74.757	13.405
	100.216	8.405
	27.216	11.27
	138.027	5.378
	120.973	10.405
	64.946	7.919
	27.568	13.405
	84.135	12.919
	93.027	7.946
	38.432	5.838
	107.162	20
	63.081	10.865
	133.459	7.432
	103.27	8.973
	97.649	9.027
	94.081	5.541
	72.946	15
	59.811	13.568
	91.73	10.703
	79.108	5.351
	70.73	6.216
	33.27	12.081
	57.892	13.378
	58.135	9.73
	49.243	7.405
	91.514	6.865
	113.459	8.189
	91.054	11.459
	79.297	6
	89.324	10.297
	60.351
	118.784	31.703
	93.135	25.946
	43.703	37.838
	86.649	36.054
	29.027	40.541
	95.297	43.243
	65.054	34.135
	36.135	44.324
	50.919	33.243
	37.297	31.946
	5.351	53.405
	29.73	94.405
	50.514	101.378
	24.757	25.838
	24.405	42.703
	42.189	27.216
	33.622	102.081
	38.811	35.703
	53.676	33.108
	61.784	22.297
	3.703	21.622
	28.432	19.622
	46.459	29.216
	43.946	24.541
	7.946	14.486
	68.081	42.486
	43.514	39.649
	29.243	22.865
	48.703	20.27
	41.541	33.865
	28.568	12.784
	65.73	30.108
	33.865	14.919
	50.892	41.054
	57.162	19.568
	27.351	27.649
	11.324	19.892
	42.324	21.73
	44.243	4
	40.135	18.595
	56.108	26.486
	3.432	36.73
	82.351	30.405
	39.297	18.054
	54.541	38.622
	41.243	22.946
	51.027	34.973
	46.108	17.135
	38.595	7.676
	46.514	4.676
	50.351	6.757
	25.919	28.622
	36.784	13.459
	66.27	32.081
	41.568	10.081
	40.892	7.568
	7.081	13.622
	34.595	14.514
	32.351	9.919
	30.054	18.135
	46.351	18.081
	67.541	10.973
	70	13.189
	41.27	16.676
	48.811	13.649
	5.865	12.892
	5.054	12.081
	24.432	17.784
	33	11.135
	32.892	11.162
	15.649	7.649
	31.378	8.946
	28.595	17.054
	44.459	26.676
	16.432	10.703
	11.757	18.757
	18.838	7.351
	4.973	8.27
	17.568	13.054
	41.568	9.135
		6.919
	88.919	12.703
	43.838	10
	77.649	17.216
	57.649	18.108
	59.784	6.892
	108.649	23.216
	139.784	6.595
	50.162	22.189
	100.054	16.297
	40.378	6.649
	45.973	7.946
	67.757	8.73
	91.568	9.189
	69.081	11.324
	80.27	9.757
	60.973	10.541
	86.351	6.838
	139.568	9.514
	79.865	6.297
	111.243	7.838
	107.297	9.297
	66.405	8.595
	103.595	7.73
	35.189	8.703
	75.892	7.946
	61.73	5.432
	84	8.919
	99.324	4.784
	72.216	7.297
	85.324	7.595
	39.649	8.541
	77.054	6.838
	53.243	4.351
	53.405	3.676
	47.135	5.514
	56.378	7.811
	25.73	8.757
	44.216
	81.162	11.595
	72.081	28.811
	42.757	36.432
	57.324	22.081
	19.865	31.216
	44.514	18.378
	37.054	35.459
	73.027	20.892
	64.568	38.081
	48.162	20.595
	31.027	19.784
	47.676	7.324
	51.135	38.865
	46.828	34.351
	21.378	13.486
	30.189	10.73
	35.514	20.297
	36.892	10.568
	68.973	13.351
	46.946	10.243
	26.757	32.486
	36.432	15.189
	33.459	35.811
	19.946	12.243
	80.838	9.432
	35.216	10.054
	34.378	7.919
	73.243	10.243
	19.703	9.784
	45.486	11.811
	26.622	5.811
	43.946	11.919
	39.838	6.514
	45.865	6.243
	30.649	8.541
	50.378	8.838
	36.703	5.243
	26	9.378
	21.27	10.108
	25	5.757
	40.541	5.459
	15.081	6.703
	21.432	6.703
	44.757	6.27
	41.378	3.973
	48.27	4.243
	9.811	5.027
	53.784
	41.189	34.081
	41.108	36.622
	27.514	40.216
	36.676	66.838
	51.243	43.108
	40.243	29.486
	36.459	32.162
	46.108	66.486
	76.919	79.216
	26.081	22.081
	65.703	82.405
	15.297	55.162
	37.162	34.973
	29.757	36.865
	42.081	37.054
	21.459	33.297
	35.649	17.432
	21.135	29.568
	40.189	29.514
	58.324	30.649
	33.297	21.216
	43.811	59.622
	56.622	35.459
	23.162	53.892
	19.27	38.73
	21.622	22.811
	34.486	16.757
	49.676	40.568
	25.351	17.486
	47.703	10.568
	20.568	33.73
	16.973	28.432
	50.622	23.973
	29.243	26.649
	25.541	25.865
	22.216	16.324
	44.595	35.216
	22.595	15.649
	14.622	12.405
	22.811	31.162
	13.054	28.919
	9.568	29.865
	30.865	28.649
	3.405	20.081
	20.27	13.459
	20.595	14.027
	14.243	22.703
	8.324	14.73
	16.486	18.189
	14.405	23.351
	16.378	37.054
	3.541	19.216
	3.514	23.189
	12.865	36.595
	20.568	14.703
	3.838	13.973
	4.73	20.649
	4.946	26.514
	62.676	21.378
	4.541	20.486
	3.595	24.514
		21.324
	96.514	11.378
	59.189	10.892
	100.892	11.432
	95.946	22.784
	96.405	27.838
	38.703	27.27
	54.919	25.162
	41.027	19.541
	94.973	12.081
	67.243	10.595
	60.757	27.676
	53.351	17.405
	6.676	15.811
	83.514	18.432
	115.405	12.432
	68.892	22.351
	56.811	21
	57.297	10.243
	46.027	12.595
	36.946	19.27
	122.973	17.324
	29.703	32.081
	116.622	11.243
	32.649	8.459
	104.486	15.351
	71.054	37.054
	65.919	17.297
	77.27	20.243
	32.324	17.541
	80.378	17.757
	46.622	10.784
	100.162	8.378
	75.946	16.541
	14.108	18.351
	80.459	3.135
	70.514	11.486
	47.811	16.649
	31.486	10.676
	42.432	11
	91.405	16.108
	60.784	10.027
	84.568	7.486
	47.189	12.541
	43.838	12.541
	65.27	13.135
	59.216	28.351
	45.73	15.541
	27.676	14.243
	33.973	17.784
	96.405	25.189
	29.432	8.892
	73.081	8.459
	63.595	17.919
	4.703	9.865
	46.243	6.514
	40.784	15.405
	64.541	14.378
	61.946	14.865
	44.297	12.595
	24.027	14.541
	65.946	20.649
	64.405	5.27
	28.405	8.432
	45.243	10.541
	40.946	9.703
	63.73	9.189
	44.622	11.676
	66.081	20.189
	48.595	11.622
	78	14.703
	45.865	7.027
	44.973	11.595
	62.973	11.324
	4.649	8.838
	26.459	13.892
	56.649	14.622
	31.189	7.622
	29.108	10
	27.243	9.216
	32.595	13.676
	20.622	17.135
	34.108	7.486
	55.135	7.946
	47.838	7.568
	26.73	7.568
	38.73	7.73
	47.865	10.649
	49.784	10.811
	33.838	7.649
	77.919	7.162
	22.432	7.189
	39.811	3.243
	52.514	7.459
	19.432	12.297
	45.027	18.162
	53.459	8.811
	33.649	7.216
	21.405	9.486
	55.892	6.649
	19.622	11.27
	30.865	16.784
	39.649	6.135
	83.459	13.595
	35.378	5.135
	55	13.27
	19.865	10.703
	31.459	9.784
	61.135	6.216
	13.459	14.324
	20.27	7.243
	39.757	8.432
	13.432	11.514
	17.243	7.216
	23.676	3.946
	45.27	13.649
	12.973	3.514
	27.595
	16.892	35.946
	36.378	29.622
	11.405	35.811
	87.541	40.243
	28.027	30.189
	40.973	21.432
	70.135	43
	20.865	17.541
	14.081	24.946
	21.703	13.622
	15.73	19.243
	40.135	27
	20.216	14.162
	15.243	14.892
	40.324	27.081
	25.973	14.973
	6.081	11.622
	28.541	17.324
	21.595	11.054
	14.108	27.514
	15.081	19.459
	4.027	14.459
	4.27	32.216
		20.054
	84.541	21.946
	123.757	17.081
	73	12
	77.838	9.865
	62.459	13.081
	37	13.514
	72.162	17.405
	103.811	7.757
	79.757	8.865
	50.297	22.595
	69.892	9.189
	77.135	7.973
	67.622	30.919
	103.135	13.189
	61.73	16.568
	51.703	13.649
	68.189	14.973
	37.919	12.541
	55.514	14
	65.865	14.892
	79.108	9.081
	21.757	10.189
	62.108	13.432
	60.838	14.784
	48.703	18.378
	97.73	10.838
	31	14.676
	43.108	10.459
	85.243	10.189
	47.081	9.73
	30.081	8.622
	20.622	16.541
	49.973	15.297
	33.108	15.432
	55	15.459
	67.378	10.054
	69.811	10.541
	30.351	12.514
	68.892	10.703
	73	12.622
	18.73	9.514
	25.162	6.297
	51.703	7.486
	54.351	12.973
	56.216	11.405
	37.108	15.27
	26.405	8.514
	29.892	17.649
	41.108	14.811
	3.432	14
	33.081	9.865
	70.595	9.73
	43.838	9.027
	44.405	9.324
	28.405	8.059
	27.892	8.919
	48.27	14.027
	53.514	10.405
	66.865	6.486
	42.784	14.135
	42.946	10.108
	16.514	7.892
	15.486	10.108
	14.622	12.568
	26.946	12.486
	21.405	4.676
	16.919	6.838
	49.73	3.703
	34.568	8.865
	39.297	10.081
	49.432	6.432
	23.027	4.216
	46.135	7.784
	26.432	3.622
	51.297	4.784
	5.297
	24.351	40.189
	46.676	73.811
	29.081	71.486
	32.189	33.811
	26.27	41.081
	75.838	45.432
	17.568	23.081
	21.243	9.351
	36.919	13.324
	49.595	9.811
	20.324	8.405
	31.649	7.865
	50.216	16.405
	6.865	29.811
	43.135	9.216
	36.405	11.784
	35.892	5.892
	17.892	18.892
	55.514	11.811
	36.027	10.784
	14.294	7.73
	54.811	12.486
	26.189	8.378
	14.081	12.243
	20.324	8.135
	17.027	11.486
	21.324	9.135
	14.892	12.568
	36.054	9.405
	43.486	10.297
	74.405	6.973
	26.405	15.541
	23.27	12.432
	33.108	6.189
	27.243	8.892
	49.595	9
	38.324	3.486
	18.514	9.405
	25.432	15.405
	22.892	12.486
	18.135	11.027
	18.459	8.568
	4.378	8.649
	4.486	7.162
	4.595	5.973
		4.946
	105.541	7.459
	44.486	7.757
	95.757
	128.676	44.351
	87.649	27.946
	97.486	65.351
	74.216	64.541
	91.324	32.243
	104.135	58
	106.595	52.378
	126.703	36.703
	87.757	35.676
	78.459	57.973
	72.108	26.162
	80.324	20.027
	110.324	29.297
	91	21.27
	76.324	13.486
	68.297	35.297
	50.486	33.324
	31.324	43.378
	52.892	18.865
	34.838	27.27
	55.73	28.649
	40.027	20.216
	93.676	31.811
	58	47.622
	82.595	8.459
	67.486	33.973
	59.622	19.703
	36	32.595
	37.622	44.162
	42	21.135
	96.243	16
	59.892	9.622
	43.784	23.054
	28.541	43.027
	41.054	41.703
	41.919	19.514
	35.216	30.622
	11.865	12.486
	32.568	16.919
	16.216	16.027
	14.595	33.378
	34.405	40.324
	53.622	26.054
	52.703	9.486
	46.054	49.568
	30.568	18.432
	45.27	16.568
	29.378	19.351
	54.514	24.162
	80.838	17.405
	87.973	19.622
	18.162	33.216
	25.243	24.162
	23.081	13.351
	21.459	27.514
	65.676	9.703
	49.027	28.811
	31.892	13.838
	31.514	17.865
	42.405	13.054
	20.622	13.027
	24.297	11.054
	55.324	17.459
	17.676	13
	32.703	13.568
	45.162	11.703
	26.703	20.973
	19.297	10.811
	36.703	7.162
		14.135
	53.838	10.784
	66.459	8.378
	21.946	14.676
	86.486	22.865
	51.649	9.595
	143.135	13.135
	52.622	22.514
	44.135	10.568
	28.432	13.865
	57.919	11.784
	100.351	10.243
	57.73	19.432
	48.784	11.216
	102.081	12.838
	64.892	19.432
	43.243	17.622
	33.297	10.892
	85.27	19.757
	84.135	8.162
	58.351	11.135
	84.135	14.568
	80.676	11.595
	47.351	10.811
	5.054	10.811
	43.946	10.216
	53.324	10.432
	35.189	15.838
	49.568	9.378
	43.216	9.541
	3.405	8.973
	53.486	9.595
	47.865	13.297
	54.73	10.973
	56.622	10.865
	58.135	5.081
	52.297	8.946
	33.432	12.946
	32.649	12.297
	13.135	11.622
	27.405	7.27
	43.595	10.378
	68.946	12.054
	60.946	9.216
	35.108	9.973
	51.054	6.568
	77.541	8.973
	45.027	6.297
	84.811	12.757
	37.189	15.622
	30.622	11.324
	28.703	13.432
	48	8.378
	34.081	9.676
	48.027	11.351
	68.27	7.973
	34.946	7.811
	29.622	11.703
	25.595	13.865
	18.946	6.946
	23	9.865
	9.243	6.108
	27.135	4.378
	48.568	8.216
	45.649	17.243
	15.892	6.189
	12.514	5.054
	44.459	9.135
	45.054	11.892
	27.541	8.324
	33.108	6.324
	30.432	6.811
	33.027	8.649
	18.865	7.811
	19.865	7.892
	23.297	8.189
	4.405	8.432
	38.189
	9.541	42
	3.297	39.135
	3.919	64.973
	4.027	24.919
	18.378	31.703
	4.189	32
	3.649	32.649
	3.432	43.405
		103.054
	113.162	109.784
	130.027	111.324
	74.784	104.162
	31.73	91.541
	30.595	20.541
	81.162	38.622
	82.135	34.514
	36.811	39.703
	48.27	59.324
	97.541	62.973
	102.243	22.946
	97.297	28.027
	55.919	28.243
	68.297	18.541
	48.432	38.351
	45.892	26.135
	46.892	19.216
	97.892	31.622
	61.405	29.27
	41.541	44.189
	46.514	21.73
	70.135	64.216
	84.378	15.676
	52.216	11.541
	56.73	14.432
	77.459	27.919
	79.595	25.892
	48.027	14.027
	62.838	8.946
	45.243	14.595
	40.054	16.676
	46.568	27.973
	93.216	26.27
	60.541	13.243
	30.081	14.811
	41.059	18.135
	66.243	12.135
	70.676	25.73
	41.432	44.297
	89.27	11.135
	31.081	16.054
	58.595	17.649
	114.448	29.73
	55	9.757
	36.216	17.243
	61.081	18.378
	60.73	20.243
	34.432	14.405
	60.297	13.189
	36.541	11.703
	19.486	17.135
	42.351	15.946
	99.243	13.973
	22.973	15.703
	50.946	21.595
	42.027	9.892
	26.865	18.459
	34.27	14.243
	63.459	10.054
	18.838	12.703
	48.486	25.784
	19.135	9.514
	46.405	20.946
	26.297	26.946
	37.568	10
	53.703	9.865
	43.649	16.838
	18.757	16.946
	45.405	12.432
	18.757	10.351
	27.541	36.27
	85.946	9.865
	32.405	13.703
	34.892	21.027
	28.432	6.973
	33.189	21.027
	25.324	9.081
	42.351	8.568
	26.432	9
	16.784	11.946
	20.514	14
	17.378	9.243
	18.081	11
	49.432	11.432
	55.838	20.486
	26.919	4.838
	12.405	12.811
	25.622	8.541
	20.081	7.73
	30.459	8.189
	25	21.459
	10.568	10.649
	48.297	12.432
	24.216	11.351
	30.135	9.432
	25.216	11.595
	30.081	9.73
	11.865	13.405
	36.946	21.459
	24.297	8.595
	13.459	14.378
	26.649	5.054
	13.892	8.243
	4	7.784
	4.324	6.865
		9.622
	99.081	13.595
	65.459	8.595
	52.811	8.324
	26.378	15.162
	79.432	5.649
	41.946	9.622
	72.622	6.459
	97.243	6.946
	67.108	7.27
	66.892	18.432
	47.919	7.541
	114.622	5.27
	142.297	6.459
	66.676	7.486
	32.108	6.973
	25.811	6.838
	46.081	5.486
	81.784	5.324
	109.568	6.703
	85.054	7.622
	76.324
	169.189	26.459
	98.946	42.703
	83.568	61.189
	55.216	43.243
	77.757	59.838
	110.162	24.135
	136.514	31.568
	114.838	50.73
	90.865	32.486
	106.676	33.27
	59.514	52.541
	85.838	60.838
	82.162	41.054
	102.486	80.973
	96.351	69.865
	89.486	89.622
	82.147	35.73
	74.027	45.081
	52.757	31.865
	91.622	38.622
	64.514	39.297
	64.351	14.784
	38.541	17.757
	78.297	21.622
	40.622	59.622
	70.568	22.432
	56.432	18.892
	71.973	35.622
	82.541	42.054
	35.243	43.378
	86.514	45.081
	75.919	36.378
	103.724	24.568
	27.622	16.622
	105.216	32.568
	110.378	30.054
	88.486	30.189
	16	36.757
	58.784	79.676
	69.892	34.459
	51.216	39.351
	63.973	40.865
	45.378	28.162
	61.946	18.216
	34.162	32.162
	118.676	33.486
	120.568	30.757
	39.162	19.622
	66.973	16.919
	47.081	35.189
	74.865	22.784
	81	30.865
	91.568	34.757
	75.162	66.595
	71.081	17.088
	57.973	45.378
	20.595	28.73
	47.703	28.973
	41.081	37.297
	41.378	51.432
	40.27	27.514
	47.919	14.243
	63.351	13.486
	41.892	16.838
	68.784	28.919
	65.081	24.676
	61.378	22.486
	22.378	25.568
	31.649	9.946
	43.054	14.027
	64.081	19.216
	19.973	27.027
	41.865	24.757
	39.838	15.459
	15.649	49.568
	12.946	29.135
	19.892	17.568
	29.757	28.757
	87	18.865
	15.135	17.838
	87.108	26.811
	44.757	21.108
	36.405	32.162
	27.432	31.432
	48.622	25.027
	60.784	20.73
	76.405	29.108
	28.027	22.73
	30.676	18.946
	32.27	12.865
	34.595	10.973
	36.676	46.622
	24.297	23.351
	37.622	18.946
	16.514	14.811
	91.378	17
	15.541	21.892
	22.027	17.622
	29.486	16.622
	28.405	20.054
	46.135	24.946
	53.595	12.378
	29.595	10.757
	35.27	12.973
	67.757	22.405
	71.946	21.838
	62.919	16.676
	29.649	9.757
	36.108	25.351
	35.216	17.703
	32.973	6.73
	30	9.432
	50.189	14.243
	23.216	9.919
	32.459	11.351
	52	14.27
	19.703	10.189
	15.676	11.108
	27.432	20.459
	36.892	15.432
	25.811	9.703
	15.892	23.135
	22	18.081
	35.757	14.568
	40.649	19.595
	39.243	16.027
	22.27	9.486
	27.568	17.27
	10.216	7.378
	23.27	34.514
	21.216	12.108
		17.297
		10.324
		12.514
		18.676
		8.892
		7.378
		17.216
		4.027
		9.892
		6.486
		20.135
		5.351
		16.811
		13.892
		7.432
		10.838
		20.892
		8.919
		9.703
		12.973
		14.649
		9.162
		15.405
		9.765
		16.703
		15.568
		8.243
		5.243
		18.216
		3.757
		56.378
		48.973
		36.541
		48.27
		60.108
		35.243
		40.297
		35.784
		69
		20.946
		53.865
		45.757
		78.324
		62.649
		74.892
		65.189
		99.784
		44.622
		63.405
		34.189
		78.946
		50.865
		55.622
		58.811
		27.649
		32.919
		50.216
		37.324
		104.135
		43.135
		47.243
		36.378
		39.486
		34.541
		42.351
		54.541
		34.378
		35.946
		34.108
		54.243
		37.865
		4.486
		53.514
		37.351
		44.054
		65.541
		21.622
		43.946
		23.514
		42.784
		34.73
		50.054
		52.054
		75.838
		41.973
		44.189
		53.703
		32.162
		20.486
		26.405
		64.568
		47.73
		24.486
		32.216
		33.649
		82.189
		34.595
		43.703
		54.351
		15.676
		52.405
		26.919
		28.703
		28.568
		45.135
		7.432
		22.514
		36.27
		46.405
		25.459
		32.486
		43.568
		36.135
		55.135
		38.919
		27.973
		13.162
		33.541
		10.243
		12
		20.27
		27.622
		36.811
		25.054
		11.595
		21.892
		35.973
		25.405
		38.541
		20.865
		31.324
		5.703
		16.459
		46.324
		16.541
		34.73
		17.703
		12.622
		26.486
		19.73
		22.919
		22.135
		17.324
		16.054
		8.838
		22.351
		16.135
		12.378
		13.568
		16.838
		19.081
		19.27
		16.351
		21.703
		6.351
		10.108
		25.649
		9.189
		5.351
		13.811
		6.27
		11.649
		14.081
		3.811
		14.162
		10.324
		21.081
		12.054
		8.973
		22.541
		4.568
		3.838
		5.973
		22.919
		8
		8.432
		16.27
		5.784
		10.054
		7.649
		15.216
		6.486
		12.135
		7.892
		8.108
		5.595
		5.568
		3.676

## Sheet: Fig. 3D
Cep135	centrosome intensity [a.u.]
	mScarlet	MYOG-mScarlet
	15.804	29.021
	24.907	26.299
	36.402	26.701
	19.175	21.412
	33.258	43.031
	28.072	18.052
	23.588	29.351
	28.34	17.845
	40.32	34.01
	18.691	24
	14.639	21.732
	20.691	23.567
	37.351	24.907
	12.629	11.299
	23.608	25.082
	10.392	18.804
	45.938	39.897
	18.897	11.186
	21.804	4.608
	24.433	31.289
	17.67	27.99
	19.629	55.124
	19.155	33.948
	23.33	28.01
	13.371	38.402
	13.474	40.412
	20.825	41.392
	27.216	22.041
	17.165	30.938
	16.108	17.155
	9.485	15.835
	14.175	48.216
	15.835	26.01
	15.474	25.258
	26.041	26.68
	32.876	27.938
	68.052	29.794
	51.474	27.876
	38.88	22.359
	50.165	11.227
	24.773	17.474
	34.742	42.938
	34.227	35
	21.361
	27.072
	43.515
	78.175
	30.258
	57.062
	40.711
	42.454
	45.598
	50.784
	40
	21.021
	24.711
	27.773
	40.34
	20.856
	34.33
	26.959
	26.763
	43.144
	40.649
	25.938
	50.948
	30.175
	52.928
	28.309
	55.041
	34.454
	27.742
	32.649
	5.495
	52.918
	17.907
	23.227
	38.309
	35.897
	36.361
	31.897
	25.134
	34.742
	5.423

## Sheet: Fig. 3E
γ-tubulin	centrosome intensity [a.u.]
	mScarlet	MYOG-mScarlet
	177.216	191.054
	139.216	192.784
	119.838	75.324
	116.865	74.135
	235.162	71.784
	117.243	70.568
	85.324	74.73
	84.919	55.622
	102.595	78.054
	145.946	56.486
	173.919	40.676
	118.676	54.541
	209.568	49.027
	120.351	42.973
	143.27	46.919
	170.486	70.297
	126.973	39.081
	110	47.432
	90.216	55.595
	81.108	53.324
	87.865	63.459
	93.649	58.622
	67.676	53
	91.838	40.541
	80.703	36.486
	63.081	43.351
	96.432	32.703
	93.324	57.486
	78.108	33.946
	88.378	41.243
	90	46.676
	75.351	58.432
	110.703	32.622
	97.892	62.027
	92.919	52.568
	56.946	34.459
	77.757	44.568
	61.73	47.108
	111.054	37.941
	63.919	46.135
	94.865	42.297
	81.865	41.162
	91.919	33.514
	99.081	53.189
	77.351	51.027
	83.811	38.649
	52.919	49.811
	95.865	33.973
	79.351	29.108
	72.946	45.054
	59.784	46.946
	80.703	42.973
	73.919	27.108
	67.243	52.108
	86.108	27.324
	101.405	37.568
	59.595	41.216
	66.216	37.595
	90.595	33.135
	49.784	40.459
	66.919	32.243
	51.784	25.811
	77.135	31.405
	71.919	23
	54.73	62.297
	73.865	60.135
	61.486	22.514
	56.568	20.351
	73.108	21.459
	66.973	7.162
	86.459	22.351
	90.486	35.351
	66.432	23.73
	74	21.216
	58
	59.27	81.568
	68.405	121.351
	60.405	91.432
	68	112.757
	53	87.054
	69.216	93.297
	70.946	77.351
	64.946	101.351
	76.676	81.432
	52.351	81.351
	66.514	63.486
	59.973	74.324
	72.432	84.595
	43.622	76.703
	40.649	50.649
	91.027	78.649
	66.324	51.378
	73.622	54.108
	52.216	73.946
	54.297	85.324
	62.378	63.351
	65.703	54.135
	63.794	63.622
	47.541	46.838
	61.378	67.378
	46.351	42.838
	55.973	66.351
	38.216	46.919
	85.757	55.324
	53.73	40.378
	64.297	48.541
	61.135	94.514
	63.459	41.081
	61.432	33.27
	47.486	43.378
	44.27	46.514
	48.351	30.189
	56.054	40.838
	42.351	53.757
	68.216	49.595
	66	40.189
	78.622	35.838
	57.054	27.946
	59.378	47.757
	80.135	42.324
	63	52.081
	43.162	43
	64.135	43.973
	39.892	30.108
	56.351	32.514
	62.297	51.135
	70.514	32.297
	34.027	48.216
	52.514	34.757
	61.054	31.189
	42.378	38.405
	55.649	40.946
	55.973	35.297
	41.405	52.514
	48.649	40.811
	47.162	42.568
	63.838	47.622
	33.892	51.757
	45.108	40.784
	52.297	32.027
	32.811	40.432
	35.27	30.865
	54	30.297
	49.595	70.108
	59.595	31.324
	38.73	32.865
	29.757	30.054
	62.324	31.838
	42.486	40.73
	46.297	28.919
	41.73	34.811
	58.432	33.811
	49.892	30.784
	53.595	36.351
	41.568	29.108
	42.081	24.27
	53.811	28.811
	40.676	25.622
	49.108	30.081
	44.405	33.108
	48.486	30.27
	54.081	22.892
	41.162
	35.189	216.351
	68.378	92.541
	41.162	83.459
	52.054	56.811
	48.135	78.541
	45.108	55.595
	43.784	49.514
	39.108	48.541
	44.189	39.73
	43.514	63.081
	32.919	47.514
	55.73	40.757
	43.324	55.865
	37.892	55.459
	38.027	45.135
	64.73	43.838
	50.027	46.081
	43.243	41.216
	55.162	40.054
	24.27	43.135
	29.351	46.108
	26.081	26.919
	32.649	26.73
	44.054	40.486
	43.919	31.216
	43.622	28.297
	33.676	29.054
	48.973	36.054
	50.784	59.486
	37.892	31.946
	50.054	25.912
	44.757	23.162
	36.649	27.405
	44.216	23.324
	63.297	40.432
	45.351	19.892
	39.946	24
	46.865
	31.294	65.622
	26	62
	27.595	52.973
	34.649	54.378
	44.703	52.378
	40.432	47.378
	40.486	36.919
	47.054	53.486
	28.081	56.811
	27.378	47.405
	59.216	39.27
	41.541	30.757
	42.351	53.243
	32.054	40.108
	31.865	50.784
	30.135	43.108
	40.703	34.622
	26.946	35.324
	38.811	41.676
	39.541	35.892
	36.865	43.676
	40.757	42.676
	38.081	25.676
	40.622	30.027
	20.568	33.946
	34.351	28.622
	22.486	64.784
	42.054	35.081
	30.838	31.486
	36.324	41.324
	25.27	32.027
	28.973	37.297
	27.432	34.216
	31.324	21.108
	26.784	34.243
		39.432
	84.811	24.784
	112.865	22.811
	133.568	32.838
	110.081
	88.568	69.378
	98.514	72.378
	78.108	79.757
	86.297	54.784
	193.73	49.189
	170.216	57.919
	200.568	50.135
	91.595	59.378
	213.486	44.027
	100.595	49.541
	71.757	59.486
	68.027	47.703
	95.595	53.243
	81.378	50.541
	89.811	33.676
	103.432	35.595
	73.108	30.432
	107.541	31.378
	76.595	32.838
	71.568	30.724
	68.946	30.432
	101.568	34.865
	76.73	39.378
	89.405	35.676
	59.595	26.973
	65.405	34.784
	80.108	36.865
	82.919	30.27
	87.459	25.73
	80.351	42.811
	69.081	32.946
	62.054	38.351
	76.216	35.649
	56.162	43.811
	87.432	25.189
	73.27	24.108
	69.703	41.649
	87.946	23.784
	107.919	34.027
	60	22.892
	71.757	27.405
	81.703
	80.73	84.216
	77.297	47.811
	91.297	54.486
	70.054	62.27
	86.73	43.27
	46.784	49.622
	59.541	39.703
	70.432	53.757
	69.405	39.865
	65.405	48.054
	65.243	32.108
	76.378	52.378
	70.892	50.757
	80.73	42.297
	56.108	42.649
	75.541	35.432
	59.838	45.027
	58.73	35.351
	79.946	48.216
	52.514	33.622
	57.189	31.189
	61.27	27.459
	64.514	31.27
	68.919	30.946
	68.595	38.351
	70.054	38.919
	52.459	31.568
	61.189	31.243
	62.784	34.324
	62.595	48.973
	75.622	29.054
	50.757	33.081
	58.189	33.622
	53.514	30.31
	71.324	35.622
	71.73	26.784
	57.108	27.135
	48.622	27.027
	69.892
	62.649	96.405
	44.054	104.703
	71.973	66.081
	44.919	59.297
	50.189	67.054
	50.162	51.541
	64.649	42.324
	43.405	42.432
	86.541	46.784
	42.595	43.703
	45.757	35.865
	55.622	38.541
	65.676	38.919
	51.189	38.73
	60.027	53.649
	50.541	42.27
	46.459	56.243
	36.514	37.919
	56.946	28.27
	42.189	48.892
	42.297	42.162
	57.216	30.541
	50.243	33.135
	44.162	45.162
	46.568	60.595
	48.054	31.892
	56	28.919
	36.243	32
	33.405	46.243
	32.622	30.892
	31.189	49
	36.946	41.378
	46.703	29.811
	59.054	35.676
	49.081	42.568
	34.514	37.189
	51.297	34.108
	34.595	30.514
	33.649	37.622
	32	25.757
	44.297	41.189
	44.73	36.73
	32.568	31.622
	48.108	31
	28.811	35.757
	50.703	31.054
	49.147	26.081
	55.784	25.162
	34.27	30.595
	37.73	33.324
	37.297	26.892
	31.243	28.054
	32.811	42.486
	39.865	27.622
	51.622	40.73
	24.706	27.243
	60.216	27.405
	45.459	35.919
	36.459	25.081
	51.216	24.919
	28	22.405
	37.108	28.027
	37.838	27.27
	30.541	24.649
	32.946	32.135
	37.351	32.784
	30.351	29.73
	31.027	27.027
	33.459	33
	25.029	21.757
	34.865	22.676
	32.108	53.946
	45.568	22.676
	29.811	23.946
	25.568	21.486
	22.027	46.595
		27.486
	102.297	26.432
	78.432	25.784
	199.486	18.784
	208.919	27.676
	175.189
	88.081	64.216
	99.865	59.828
	182.676	46.946
	176.757	48.135
	79.973	44.541
	80.757	54.27
	93.838	44.378
	75.514	48.973
	93.27	53.892
	67.703	42.486
	110.838	57.345
	94.243	53.216
	79.73	55.297
	73.865	46.838
	90.595	35.811
	89.189	56.973
	53.27	35.865
	62.757	40.243
	101.027	48.676
	89.649	45.459
	46	31.568
	80.351	31.162
	74.541	28.838
	83.919	58.378
	74.595	42.135
	74.27	41.757
	62.568	35.865
	49.432	45
	74.162	36.784
	55.351	31.946
	69.784	34.108
	74.622	45.73
	72.892	44.73
	57.649	32.595
	69.081	33.946
	54.973	40.838
	59.973	36.351
	61.892	36.189
	72.351	38.297
	69.919	27.595
	56.324	31.054
	65.432	32.216
	74.73	24.027
	56.941	25.162
	43.676	26.676
	87.838	41.595
	53.649	31.931
	62.216	45.595
	71.541	35.189
	95.946	30.784
	72.838	23.73
	70.162	35.595
	53.649	26.865
	74.216	29.054
	71.784	36.946
	56.595	42.919
	58.027	39.351
	53.865	30.865
	71.216	39.865
	55.649	33.973
	55.108	29.351
	50.514	32.135
	61.054	27.081
	48.432	30.486
	61.243	25.135
	45.811	38.541
	49	28.595
	74.459	38.324
	52.838	25.189
	73.676	25.081
	69.378	34.405
	59.297	37.973
	53.486	22.892
	46.838	30.595
	70.568	31.027
	74.811	30.676
	34.703	21.081
	60.27	23.081
	71.919	27.622
	74.973	54.811
	48.459	25.108
	49.324	33.784
	58.054	27.514
	49.946	27.811
	34.189	26.595
	40.027	32.027
	65.703	29.351
	69.73	28.27
	37.135	19.324
	60.514
	39.622	106.081
	52.405	102.459
	70.892	85.946
	46.297	76.108
	49.054	75.73
	46.459	52.568
	35.622	47.027
	42.703	51.486
	49.757	57.27
	56.703	45.649
	37.108	46.405
	62.811	67.892
	60.324	39.649
	49.162	36.676
	45.73	55.514
	36.027	56.703
	42.838	30.081
	39.73	46.865
	36.892	47.027
	54.135	45.027
	44.784	39.405
	37.568	42.595
	42.135	50.189
	49.297	40.405
	38.189	50.865
	32.135	45.054
	54.811	31.135
	39.73	39.784
	41.189	45.73
	34.865	36.703
	34.432	36.919
	43.568	45.784
	34.649	34.595
	27.432	49.676
	37.973	43
	28.108	34.216
	61.676	45.595
	32.865	41.027
	44.405	59.189
	29.649	31.054
	25.162	35.27
	48.838	44.189
	32.162	37.541
	47.784	32.541
	39.919	37.919
	39.757	37
	31.757	24.892
	41.243	43.865
	45.622	28.973
	33.703	43.784
	28.973	28.919
	32.486	31.514
	31.081	35.108
	28.486	37.622
	40.378	27.676
	29.622	34.541
	32.27	31.216
	40	25
	38.486	27.216
	44.135	30.811
	26.378	24.351
	29.919	40.568
	36.108	27.865
	27.568	23.351
	32.324	31.946
	23.73	38.216
	35.216	37.108
	24.757	26.135
	22.73	24.649
	29.73	28.297
	30	35.486
	57.324	38.459
	31.541	36.243
	38.703	38.595
		25.676
	79.541	34.514
	135.919	27.081
	129.946	26.757
	107.297	26.784
	179.324	45.081
	182.865	30.054
	94.865	27.378
	132.919	21.297
	106.243	26.378
	100.757	35.108
	189.757	51.971
	110.378	20.838
	209.189	19.324
	188.135	22.351
	185.027
	108.378	56.865
	110.243	53.622
	80.595	52.73
	95.622	74
	82.459	37.757
	87.973	53.811
	100.486	39.622
	78.351	40.703
	79.486	37.919
	61.216	45.649
	98.054	50.757
	77.297	29.703
	73.919	34.054
	69.486	28.405
	96.541	46.865
	73.27	37.622
	135.73	38.73
	72.189	31.919
	84.378	33.838
	102.757	37
	74	26.459
	82.216	30.919
	95.514	69.378
	98.784	29.514
	77.027	36.162
	58.73	33.892
	76.486	33.811
	67.135	30.757
	70.514	34.297
	69.189	31.568
	92.189	32.946
	66.514	34.108
	114.568	24.595
	101.892	62.27
	64.514	28.162
	68.216	29.405
	68.568	28.892
	76.297	37.486
	52.353	27.595
	72.784	27.297
	65.784	23.378
	88.811
	67.162
	85.405
	40.162
	72.919
	61.351
	93.568
	78.351
	52.243
	77.892
	100.378
	62.595
	56.865
	99.108
	64.595
	89.351
	62.811
	100.919
	84.649
	64.243
	63.865
	62.324
	85.647
	77.919
	67.838
	78.216
	56.838
	54.784
	84.919
	77.405
	82.135
	80.73
	63.243
	55.649
	39.703
	63.973
	44.568
	56.541
	56.189
	64.459
	64.946
	72.541
	50.27
	62.73
	50.649
	89.568
	76.757
	62.757
	63.757
	53.892
	45.811
	62.622
	56.108
	59.378
	53.297
	50.514
	59.297
	43.27
	55.811
	66.054
	50.486
	63.784
	60.973
	50.703
	54.622
	64.243
	66.297
	54.784
	69.676
	51.108
	55.649
	62.027
	57.081
	59.216
	54
	56.054
	49.514
	79.243
	53.432
	80.243
	54.622
	85.73
	57.054
	52.838
	51.034
	54.324
	48.568
	48.73
	40.73
	70.27
	40.622
	44.649
	63.73
	51.27
	53.459
	45.351
	57
	62.973
	55.892
	40
	64.541
	49.649
	40.432
	54.919
	55.622
	49.946
	44.811
	45.838
	36.054
	43
	54.459
	49.919
	48.243
	58.027
	35.568
	51.243
	26.865
	46.757
	42.27
	43.919
	41.162
	40.243
	43.108
	54.919
	61.892
	51.162
	35.432
	48.378
	40.432
	68.405
	58.649
	33.541
	42.486
	30.162
	45.378
	45.405
	43.162
	49.216
	42.865
	49.649
	42.865
	33.784
	32.27
	34
	34.027
	52.189
	29.541
	44.378
	26.919
	53.757
	29.243
	44.865
	41.378
	36.649
	29.595
	27.216
	37.973
	29.811
	34.946
	45.973
	32.784
	35.838
	49.27
	39.243
	34.162
	37.676
	40.811
	36.405
	28.541
	47.973
	38.838
	36.216
	36.459
	35.703
	33.324
	24.676
	26.027
	27.541
	29.865
	35
	31.649
	24.459
	97.459
	100.676
	123.405
	101.541
	79.432
	99.351
	152.703
	82.568
	150.73
	95.811
	74.73
	196.541
	201.973
	73.108
	130.081
	132.459
	110.459
	117.811
	131.784
	95.324
	71.027
	73.919
	114.649
	98.811
	79.432
	116.27
	83
	82.946
	88.973
	89.351
	69.865
	64.703
	98.541
	68.216
	85.459
	76.027
	71.135
	70.973
	78.757
	89.081
	68.459
	85.541
	67.378
	101.27
	84.486
	89.595
	90.595
	66.162
	70.081
	88.135
	60.108
	62.541
	78.135
	79.351
	81.73
	74.162
	70.405
	69.946
	82.757
	65.649
	83.676
	71
	60.784
	74.459
	39.676
	67.649
	51.108
	71.216
	63.595
	65.784
	68.162
	69.297
	68.027
	52.541
	44.622
	62.838
	55
	41.297
	65.676
	78.432
	61.054
	58.27
	59.676
	49.595
	68.676
	61.378
	34.081
	42.378
	45.865
	60.216
	65.595
	55.541
	70
	51.514
	62.784
	56.27
	69.027
	55.216
	57.108
	55.378
	56.811
	54.757
	67.432
	55.919
	49.649
	56.486
	48.757
	33.432
	55.243
	48.324
	47.243
	34.054
	47.892
	42.081
	67.541
	51.027
	64.108
	56.703
	47.73
	33.757
	57.865
	31.108
	46.162
	54.162
	66.568
	67.514
	46.081
	66.135
	46.189
	59.811
	42.514
	47.973
	62.703
	44.324
	75.324
	37.027
	35.514
	46.081
	53.568
	31.73
	36.486
	48.595
	34.865
	45.027
	45.162
	45.027
	45.459
	47.676
	42.108
	35.946
	32.081
	28.865
	33.378
	24.892
	25.405
	27.595
	36.405
	29.703
	20.514
	21.216
	131.595
	135.297
	113.649
	111.189
	92
	156.27
	136.459
	112.757
	106.946
	121.811
	141.324
	82.757
	121.514
	109.973
	121.324
	75.243
	95.811
	85.946
	135.405
	93.486
	112.027
	83.838
	130.081
	78.27
	72.459
	67.703
	94.811
	74.622
	58.811
	73.622
	73.973
	69.378
	82.297
	68.946
	77.378
	69.405
	70.622
	86.162
	98.189
	112.081
	111.838
	69.649
	81.162
	99.757
	76.622
	81.297
	87.486
	72.081
	70.838
	81.757
	73.568
	85.703
	57.027
	105.568
	92.486
	77
	73
	60.973
	61.135
	74.676
	77.297
	85.622
	61.216
	84.73
	64.649
	46.324
	61.459
	78.514
	72.324
	73.135
	63.811
	46.919
	70.838
	62.351
	71.676
	63.27
	77.649
	67.135
	58.73
	54.324
	63.811
	56.973
	35.459
	54.892
	65.514
	71.405
	49.838
	44.189
	71.108
	57.73
	61.622
	69.676
	45.486
	44.243
	62.973
	39.811
	53.243
	55.108
	40.811
	39.568
	57.649
	58.622
	62.216
	51.405
	39.108
	61.784
	88.405
	48.351
	42.351
	47.216
	49.73
	58.459
	39.378
	46.973
	34.865
	45.865
	41.108
	42.108
	39.081
	37.784
	48.135
	48.541
	35.054
	28.649
	53.405
	53.784
	68
	44.703
	40.297
	65.541
	37.73
	31.838
	43.622
	28.622
	22.919
	49.432
	178.324
	172.135
	99.541
	139.081
	153
	147.892
	108.595
	118.297
	102.703
	95.568
	77.514
	65.324
	96.324
	93.216
	70.784
	88.27
	86.811
	93.892
	76.486
	90.297
	59.054
	80.297
	96.946
	77
	65.784
	63.189
	89.919
	70.162
	75.405
	64
	85.432
	77.919
	65.892
	50.081
	83.514
	60.459
	67.405
	74.595
	78.162
	52.892
	66.838
	73
	81.027
	63.297
	71.054
	71.541
	74.324
	63.432
	64.162
	83.541
	64.135
	96.27
	66.973
	50.324
	55.73
	76.216
	67.27
	39.054
	50.568
	52.486
	61.351
	76.459
	95.216
	70.919
	48.568
	54.081
	70.27
	50.054
	45.892
	53.919
	57.973
	51.324
	35.676
	63.189
	59.514
	71.216
	61.838
	69.892
	56.946
	40.432
	40.541
	64.892
	53.351
	44.595
	49.514
	50.919
	51.865
	34.459
	52.324
	43.568
	55.568
	44.108
	64.027
	26.432
	49.676
	38.351
	51.676
	45.676
	40.811
	46.405
	42.649
	51.297
	46.486
	34.73
	40.595
	50.811
	51.081
	44.324
	47.865
	58.432
	54.216
	49.486
	65.838
	54.135
	44.757
	61.541
	36.378
	60.811
	33.892
	57.595
	30.676
	38.541
	41.946
	39.027
	40.946
	46.189
	36.297
	36.973
	37.865
	32.865
	45.973
	51.459
	27.541
	51.297
	47.243
	46.27
	44.946
	44.297
	39.541
	42.622
	36.243
	45.865
	39.811
	70.486
	46.703
	72.838
	31.919
	38.811
	48.973
	35.838
	41.703
	26.703
	30.838
	33.054
	31.784
	44.784
	35.649
	34.811
	30.541
	40.595
	30.946
	34.622
	31.189
	38.541
	36.162
	35.622
	48.73
	31.297
	25.838
	31.892
	35.649
	33.297
	26.892
	21.568
	37.189
	21.946
	32.514
	43.081
	27.649
	32.162
	24.459
	29.324
	33.568
	35.946
	27.216
	31.243
	23
	26.324
	33
	20.351
	19.459
	109.73
	129.243
	90.514
	76.486
	85.784
	82.378
	84.486
	130.243
	189.108
	94.405
	78.189
	85.649
	76.703
	88.703
	106.595
	88.486
	91.757
	100.568
	123.243
	118.919
	62.784
	95.324
	83.324
	90.541
	113.432
	81.108
	104.676
	63.486
	88.919
	82.486
	78.514
	85.514
	86.189
	83.568
	73.838
	55.73
	68.054
	69.459
	70.486
	63.297
	82.243
	87.324
	100.378
	81.595
	78
	71.784
	63.054
	81.838
	64.919
	86.622
	61.135
	52.241
	81.73
	64.703
	82.081
	83.838
	60.108
	78.919
	67.703
	63.162
	70.27
	69.703
	85.351
	76.324
	61.459
	57.973
	62.946
	51.216
	53.027
	91.27
	65.081
	93.838
	101.622
	66.378
	69.73
	74.541
	48.297
	77.27
	43.216
	60.378
	72.703
	58.324
	44.838
	55.108
	70.135
	61.595
	73.378
	58.595
	46.135
	49.027
	52.459
	60.027
	46.297
	38.784
	57.919
	73.73
	64.189
	52.081
	48.676
	69.432
	63.703
	54.486
	62.297
	53.486
	59.946
	40.081
	72.541
	48.081
	40.811
	50.676
	39.73
	43.351
	67.27
	40.649
	43.649
	46.486
	45.27
	61.405
	56.027
	61.514
	39.027
	44.135
	65.568
	55.838
	46.432
	57.27
	38.703
	65.892
	47.27
	49.865
	48.108
	42.514
	53.432
	50.811
	47.514
	56.054
	45.73
	31.405
	36.216
	39.649
	41.405
	79.216
	30.676
	35.649
	39.27
	39.919
	42.514
	42.405
	61.703
	41.703
	36.676
	46.568
	41.216
	25.595
	41.378
	27.838
	25.649
	49.378
	99.162
	113.649
	80.486
	116.541
	130.459
	98.486
	67.649
	109.973
	111.486
	104
	121.865
	142.081
	94.811
	89.243
	109.73
	104.676
	111.243
	101.027
	88.919
	86.568
	84.784
	77.27
	101.595
	107.622
	97.649
	76.432
	77.649
	70.405
	70.27
	71.459
	95.324
	94.459
	90.919
	72.946
	89.811
	95.351
	62.595
	62
	100.649
	112.108
	87.432
	68.486
	70.757
	79.73
	65.351
	78.108
	81.189
	95.595
	64.135
	82.838
	64.649
	66.027
	60.027
	90.216
	66.135
	64.027
	62.595
	70.838
	59.297
	58.784
	74.676
	65.486
	80.568
	65.486
	62.432
	58.73
	52.216
	63.216
	75.486
	65.568
	71.568
	75.486
	80.081
	60.784
	52.973
	70.486
	46.189
	68.108
	61.973
	45.703
	50.459
	45.73
	48.081
	63.892
	75.108
	66.676
	50.054
	69.189
	67.351
	54.757
	70.135
	58.514
	39.351
	58.432
	55.27
	47.243
	46.946
	46.514
	71.027
	56.676
	54.811
	54.838
	38
	47.892
	45.378
	56.649
	52.838
	48.432
	49.486
	44.622
	64.324
	52.946
	60.622
	47.162
	35.486
	61.568
	47.973
	51.541
	37.162
	48.459
	55.027
	70.568
	47.838
	63.486
	47.514
	38.027
	32.703
	58.757
	50.568
	56.622
	48.595
	45.973
	42.324
	38.135
	33.811
	52.27
	78.865
	55.162
	38.405
	35.108
	36.838
	47.378
	53.595
	50.324
	42.514
	40.647
	36.351
	38.973
	39.432
	33.351
	24.811
	34.216
	42.189
	37.027
	31.108
	35.432
	35.946
	36.243
	31.324
	40.703
	32.405
	37.892
	32.568
	62.838
	30.162
	27.027
	31.297
	39.541
	33.622
	35.243
	118.73
	91.568
	150.135
	181.595
	97.73
	117.108
	196.865
	152.919
	107
	118.568
	129.297
	189.514
	118.784
	174.216
	120.757
	157.054
	107.081
	143
	158.135
	115
	95.378
	80.541
	76.459
	95.351
	102.973
	128.757
	105.676
	86.676
	66.568
	88
	91.946
	75.73
	57.703
	66.486
	74.514
	71.459
	79.757
	88.73
	64.486
	73.514
	85.514
	88.135
	143.378
	70.757
	67.73
	74.297
	84.514
	88.865
	69.405
	69.459
	77.757
	67.189
	69.405
	47.378
	68.703
	101.108
	68.189
	69.405
	91.054
	68.081
	78.405
	60.108
	61.919
	70.378
	78.324
	91.081
	91.243
	88.486
	58.838
	69.351
	70.676
	96.892
	76.973
	82.622
	65.514
	68.514
	58.622
	74.919
	72.27
	43.297
	39.405
	67.378
	56.541
	78.027
	65.081
	67.973
	53.919
	55.324
	55.946
	42.405
	44.027
	51.892
	66.135
	40.946
	56.811
	43.514
	61.486
	63.27
	43.189
	63.486
	66.568
	67.892
	40.135
	40.324
	53.865
	48.595
	56.568
	61.649
	59.784
	49.243
	54.946
	72.432
	62.216
	50.811
	53.216
	60.649
	48.757
	41.919
	64.676
	44.838
	51.135
	52.459
	50.865
	59.784
	59
	53.405
	47.676
	60.622
	48.189
	55.135
	61.784
	46.189
	47.459
	44.243
	39.27
	68.189
	46.486
	33.838
	46.541
	65.649
	48.622
	57.189
	49.405
	50.486
	49.135
	50.216
	44.892
	56.973
	40.703
	60.649
	34.676
	50.135
	54.541
	56.595
	63.892
	43.622
	45.432
	39.108
	47.622
	41.27
	36.649
	39.541
	36.541
	37.054
	38.081
	48.216
	41.784
	44.351
	42.568
	34.027
	44.486
	31.027
	32.784
	38.649
	31.054
	29.568
	34.459
	30.595
	27.568
	55.595
	38.703
	43
	27.838
	38.757
	41.081
	39.216
	32.946
	42.135
	41.919
	49.595
	33.514
	49.649
	30.946
	39.135
	32.459
	37.108
	46.784
	45.189
	39.432
	44.216
	44.73
	37
	38.405
	40.162
	30.865
	27
	26.649
	32.919
	24.27
	32.081
	42.459
	27.811
	31.027
	23.703
	28.811
