# Supplementary material for: Myogenin controls via AKAP6 non-centrosomal microtubule-organizing center formation at the nuclear envelope
Source: eLife. 2021 Oct 4;10:e65672. doi: 10.7554/eLife.65672 (PMC8523159; doi:10.7554/eLife.65672)
Supplement: Figure 5—source data 1. [file elife-65672-fig5-data1.xlsx]

## Sheet: Fig. 5B
		Akap6+/C2C12 nuclei [%]			PCM1+/C2C12 nuclei [%]
	si-ctrl	13.2	11.8065	11.9463	12	10.0996	9.12752
	si-Akap6	5.03876	4.6875	4.79896	3.74677	3.26704	3.11284

## Sheet: Fig. 5D
PCM-1	nuclear envelope coverage [%]
	si-ctrl	si-Akap6
	54.974
	24.645	2.09
	46.053	0
	39.272	0
	26.012	1.667
	53.125	0
	5.399	0.901
	45.255	7.287
	43.28	2.907
	0.598	0
	23.134	0.58
	64.919	0.478
	47.79	3.303
	8.605	0.144
	15.353	0
	5.556	0
	50.472	0
	29.372	0
	15.06	0.94
	12.994	0.669
	59.959	0.779
	28.533	1.393
	4.854	1.375
	82.044	4.506
	34.855	0.115
	30.303	2.368
	37.293	2.278
	31.224	0
	26.857	1.404
	0.636	0.152
	12.121	0.883
	31.195	0.481
	19.624	0.152
	76.23	1.987
	21.307	0.42
	11.229	4.308
	55.495	7.367
	19.324	0
	37.5	1.103
	3.942	2.381
	0	2.038
	37.685	6.991
	30.227	10.043
	25.778	0
	17.925
	37.059	2.1
	29.319	2.64
	27.313	5.61
	1.835	1.198
	46.491	6.818
	57.045	2.669
	37.561	0.651
	7.711	1.618
	11.538	1.077
		5.736
	37.5	3.294
	42.308	4.577
	30.387	1.52
	65.873	1.235
	36.42	0
	29.36	4.505
	24.074	0
	42.132	3.871
	12.437	5.167
	9.417	0
	63.415	0.288
	8.667	1.343
	24.372	2.09
	14.789	1.76
	19.756	0
	35.028
	44.335	7.377
	12.955	14.59
	43.31	24.28
	28.654	12.342
	41.25	6.078
	36.257	3.273
	7.172	2.549
	32.812	9.16
	9.326	0
	20.675	0.505
	45.211	0
	43.75	13.452
	23.904	23.322
	9.534	0.996
	8.958	33.135
	25.974	17.914
	47.682	6.936
	23.718	35.071
	32.719	10.487
	2.74	6.579
	8.627	0.267
	1.394	5.61
	14.545	3.214
	32.339	27.758
	73.762	5.263
	23.214	0
	14.372	7.741
	34.115	3.98
		0.639
	10.684	9.091
	4.712	10.829
	12.136	0.181
	11.244	0.769
	3.831	2.756
	21.316	7.767
	15.89	5.212
	9.787	6.713
	3.07	10.046
	21.684	0.273
	8.462	9.698
	5.236	0.469
	17.411	5.936
	31.944	12.545
	1.301	2.82
	3.815	13.389
	11.745	10.613
	41.02	18.664
	15.823	48.429
	0.655	5.324
	32.911	15.175
	26.295	2.429
	0	20.056
	17.548	0.877
	41.176	7.8
	10	0
	16.667	11.353
	10.746	3.878
	8.145	23.958
	23.75	5.495
	8.716
	26.327	18.443
	3.93	6.987
	13.83	32.886
	21.934	14.824
	15.939	4.225
	0.714	8.571
	8.108	8.744
	21.652	6.869
	21.471	12.5
	21.19	9.048
	31.329	13.397
	10.748	11.707
	28.839	1.523
	46.172	3.98
	52.153	0.246
	71.308	0.355
	9.787	8.333
	68.263	5.202
	84.967	15.171
	35.204	3.953
	56.122	23.721
	8.407	1.88
	50.882	12.332
	21.25	22.807
	93.017	12.673
	20.876	2
	23.624	23.397
	13.83	15.206
	47.409	5.159
	17.195	6.995
	33.333	9.536
	12.626	3.141
		3.361
	26.486	22.642
	1.237	0.426
	7.713	5.297
	53.354	13.402
	11.778	1.613
	79.339	18.932
	52.469	1.196
	35.526	24.719
	6.593	4.318
	54.337	6.027
	6	22.124
	0.224	4.077
	34.492	16.098
	70.056	0
	28.358	1.408
	36.313	20
	35.669	13.971
	21.739	8.636
	51.478	11.992
	64.839	8.131
	14.595	13.729
	19.337	3.361
	26.546	2.698
	49.468	5.466
	78.718	17.686
	91.824	2.691
	16.667	14.72
	2.165	4.564
	22.247	16.319
	27.13	1.415
	11.814	14.375
		25.792
	1.167	48.242
	10.644	12.212
	8.714	25.882
	14.628	17.382
	8.791
	19.86	3.286
	27.436	11.351
	3.155	1.869
	11.881	30.583
	52.857	47.699
	12.281	19.689
	57.6	21.628
	3.766	17.876
	4.752	19.008
	31.429	52.679
	28.141	17.568
	7.992	42.216
	25.833	31.39
	16.486	29.512
	34.898	82.297
	36.337	38.083
	2.988	13.47
	28.144	9.605
	27.926	43.75
	6.633	5.374
	53.155	40.609
	19.01	26.757
	8.333	28.158
	17.196	0.49
	8.201	2.146
	3.801	6.522
	87.949	11.724
	12.413
	10.891	8.723
	15.591	9.204
	32.5	61.824
	55.526	2.285
	69.745	55.337
	52.57	15.225
	28.453	16.667
	3.682	2.124
	58.259	6.931
	49.474	6.416
	17.488	1.706
	26.131	14.093
	19.289	5.637
	36.842	12.749
	77.123	13.786
	23.053	2.191
	16	3.061
		0.837
	8	15.546
	29.834	0.88
	17.488	20.48
	31.944	14.07
	4.061	16.898
	2.455	6.923
	15.526	1.263
	23.874	6.784
	22.201	17.793
	29.333	32.937
	7.301	35.849
	0.493	9.069
	37.385	23.899
	40.116	3.25
	19.55	24.262
	2.765	36.101
	18.306	20.413
	22.33	5.028
	29.883	5.028
	18.783	41.35
	11.395	58.442
	0.593	62.426
	44.366	14.451
	25.25	9.502
	18.852	0.667
	23.659	7.377
	2.174	31.679
	95.918	9.17
	41.509	5.374
	41.422	2.299
	21.46	6.349
	22.346	20.332
	17.157	19.2
	6.349	15.982
	16.837	20.058
	13.105	9.829
	23.868	7.173
	45.93	1.449
	40.909	19.084
	25.652	15.854
	9.021	3.125
	12.121	2.247
	19.945
	15.315	21.676
	5.392	15.878
	21.327	2.336
	50.278	10.315
	34.706	16.587
	11.611	8.791
	19.231	10.731
	19.143	23.711
	34.511	0.469
	13.107	6.195
	52.762	20.857
	19.048	35.223
	25.641	19.415
	47.205	38.298
	12.395	1.238
	2.778	0.38
	0.427	12.5
	3.807	23.529
	27.854	12.281
	17.708	2.027
		13.021
	10.274	25
	0	3.448
	14.048	0.251
	1.016	12.448
	16.245	42.724
	13.404	34.054
	0	9.686
	12.857	3.472
	27.174	7.358
	8.584	9.189
	13.772	28.173
	22.244	26.295
	27.34	19.663
	17.092	13.804
	15.657	27.725
	53.009	18.182
	14.352	5.204
	17.051	10.92
	0.644	22.8
	2.663	28.148
	9.307	20.207
	16.99	41.429
	57.627	7.921
	24.615
	55.189	20.38
	2.618	30.435
	26.536	13.441
	45.177	16.279
	17.391	31.457
	37.719	0.935
	7.107	42.786
	4.225	16
	39.269	26.875
	18.905	23.423
	2.392	12.885
	24.269	36.301
	18.075	25.269
	6.615	9.218
	35.468	14.815
	4.42	28.238
	15.972	5.556
	37.968	9.119
	16.52	34.112
	6.801	26.535
	34.292	25.336
	4.878	3.761
	32.519	36.74
	14.365	22.781
	38.918	17.202
	28.922	45.522
	58.974	60.045
	10.938	15.166
		23.039
	25.947	38.655
	46.739	4.497
	8.101	15.952
	62.15	40.586
	31.481	6.279
	15.672	65.182
	27.889	8.271
	0
	37.195	22.09
	12.383	42.12
	40.513	5.894
	35.771	24.517
	3.347	11.173
	22.613	17.797
	60.63	28.387
	38.462	23.131
	74.451	44.03
	81.469	10.553
	85.057	35.028
	66.892	5.023
	43.564	28.079
	44.56	17.135
	12.624	3.061
	37.931	22.652
	24.742	2.683
	35.805	37.681
	29.444	16.842
	16.486	4.167
	42.18	4.762
	9.896	1.225
	11.212	24.854
	26.683	10.628
	30.707	12.308
	40.526	6
	46.154	15.561
	35.249	27.966
	3.269	23.128
	8.947	3.409
	31.25	13.684
	11.707	25.355
	11.137
	0
	28.571
	0
	12.322
	4.545
	30.162
	52.632
	0
	30.702
	19.681
	53.179
	3.421
	7.105
	0.685
	73.298
	27.684
	42.537
	26.023
	10.476
	31.701
	6.416
	86.343
	78.495
	7.812
	38.415
	12.912
	17.526
	5.696
	35.567
	39.326
	6.681
	40.84
	27.723
	59.581
	8.768
	11.298
	2.451
	24.515
	9.717
	22.98
	28.475
	18.351
	19.643
	20.101
	18.16
	22.368
	14.516
	33.846
	23.041
	17.382
	20.066
	31.79
	35.542
	7.234
	37.105
	14.758
	31.757
	9.111
	20.359
	21.557
	13.636
	47.006
	80.588
	45.392
	16.667
	35.417
	27.922
	31.098
	65.667
	60.821
	0.89
	2.336
	12.304
	6.744
	3.608
	18.386
	5.314
	21.818
	0
	17.877
	26.012
	2.336
	20.942
	28.646
	56.579
	85.987
	36.939
	32.08
	29.639
	28.771
	36.243
	26.944
	29.337
	33.726
	18.137
	32.197
	17.249
	19.213
	13.023
	1.606
	22.629
	3.4
	36.854
	2.97
	4.713
	20.946
	21.182
	21.951
	9.184
	23.988
	17.727
	82.955
	28.115
	22.637
	36.047
	17.143
	16.029
	15.023
	16.842
	23.276
	34.756
	16.738
	17.914
	7.727
	33.898
	15
	46.117
	38.863
	65.638
	6.889
	46.726
	24.205
	72.191
	20.29
	84.437
	2.235
	3.5
	27.851
	38.67
	27.212
	30.447
	32.392
	8.065
	43.927
	26.613
	64.706
	68.033
	6.42
	37.657
	36.992
	40.12
	0.746
	28.497
	27.852
	21.429
	58.929
	35.359
	39.891
	27.059
	39.402
	12.602
	39.53
	29.255
	23.775
	34.305
	51.688
	10
	62.814
	24.879
	33.171
	13.208
	33.133
	26.51
	5.181
	10.619
	13.743
	18.274
	32.407
	16.595
	13.056
	29.825
	19.108
	32.759
	31.768
	11.438
	20.034
	7.485
	0
	51.258
	34.031
	51.732
	51.94
	71.786
	61.194
	15.337
	19.945
	20.854
	23.864
	22.254
	11.979
	9.948
	24.545
	25.429
	24.315
	23.148
	18.956

## Sheet: Fig. 5E
PCNT	nuclear envelope coverage [%]
	si-ctrl	si-Akap6
	9.9336	7.649
	9.9534	1.47525
	10.0464	1.49575
	10.053	1.5
	10.1562	1.5025
	10.2126	1.6145
	10.227	1.617
	10.3086	1.625
	10.656	1.628
	10.7142	1.6305
	10.896	1.63625
	10.968	1.649
	11.0604	1.66675
	11.1864	1.67525
	11.2068	1.68
	11.2698	1.69125
	11.4084	1.695
	11.5878	1.71
	11.8056	1.722
	11.9682	1.72425
	12.0306	1.728
	12.2058	1.75125
	12.2328	1.7515
	12.2448	1.7535
	12.3882	1.76775
	12.6168	1.77675
	12.6444	1.78575
	13.0158	1.79375
	13.0674	1.81675
	13.0986	1.83075
	13.2672	1.8575
	14.2104	1.872
	14.2668	1.88575
	14.2944	1.90675
	14.4	1.91225
	14.9256	3.1815
	5.901	3.1815
	5.983	3.1815
	6	3.2109
	6.01	3.2305
	6.458	3.2473
	6.468	3.2984
	6.5	3.3495
	6.512	3.3978
	6.522	3.4314
	6.545	3.4426
	6.596	3.4454
	6.667	3.4615
	6.701	3.5
	6.72	3.5
	6.765	3.5
	6.78	3.5
	6.84	3.5658
	6.888	3.6547
	6.897	3.6694
	6.912	3.6925
	7.005	3.7198
	7.006	3.7275
	7.014	3.738
	7.071	3.7436
	7.107	3.7835
	7.143	3.8045
	7.175	3.8122
	7.267	3.8353
	7.323	3.9564
	7.43	3.9949
	7.488	3.9998
	7.543	4.0047
	7.627	4.0383
	7.649	4.0383
	1.47525	4.046
	1.49575	4.074
	1.5	4.0929
	1.5025	4.0929
	1.6145	4.1069
	1.617	4.1174
	1.625	4.1174
	1.628	4.1307
	1.6305	4.1881
	1.63625	4.2
	1.649	4.207
	1.66675	4.5206
	1.67525	4.5276
	1.68	4.55
	1.69125	4.5584
	1.695	4.5654
	1.71	4.5815
	1.722	4.6172
	1.72425	4.6669
	1.728	4.6907
	1.75125	4.704
	1.7515	4.7355
	1.7535	4.746
	1.76775	4.788
	1.77675	4.8216
	1.78575	4.8279
	1.79375	4.8384
	1.81675	4.9035
	1.83075	4.9042
	1.8575	4.9098
	1.872	4.9497
	1.88575	4.9749
	1.90675	5.0001
	1.91225	5.0225
	16.556	5.0869
	16.589	5.1261
	16.744	5.201
	16.755	5.2416
	16.927	5.2801
	17.021	5.3389
	17.045	5.3543
	17.181	5.4222
	17.76	5.4278
	17.857	5.4635
	18.16	5.4761
	18.28	5.5055
	18.434	5.516
	18.644	5.5944
	18.678	5.6217
	18.783	5.7407
	19.014	5.7729
	19.313	5.7764
	19.676	5.7799
	19.947	5.7988
	20.051	5.8891
	20.343	5.9759
	20.388	6.0046
	20.408	6.1439
	20.647	6.2965
	21.028	6.3252
	21.074	6.3406
	21.693	6.5422
	21.779	6.6766
	21.831	6.8292
	22.112	6.8936
	23.684	6.9286
	23.778	6.9622
	23.824	7
	24	7
	24.876	7.1092
	25	7.1218
	25.253	7.2919
	25.648	7.35
	26.54	7.3871
	26.891	7.5523
	27.114	7.6279
	27.655	7.6328
	27.696	7.8652
	27.804	8.3524
	29.128	8.4259
	29.396	8.5715
	29.469	8.5911
	29.556	8.7934
	29.948	8.8557
	30.18	9.1371
	30.702	9.1567
	31.1	9.2309
	31.138	9.3086
	31.597	9.4948
	31.641	9.5452
	33.217	9.5858
	33.533	10.0331
	33.784	10.0604
	33.957	10.1108
	34.562	10.1108
	36.538	10.1318
	36.813	10.1689
	36.99	10.171
	37.121	10.3306
	37.799	10.4146
	38.071	10.4804
	38.776	10.5945
	39	10.6253
	39.202	11.123
	39.427	11.3022
	40.076	11.5318
	41.389	11.6669
	41.636	11.7698
	41.807	11.7936
	42.067	12.0463
	42.604	12.5153
	43.264	12.5286
	44	12.8331
	44.324	12.8478
	44.601	12.8849
	45.223	12.9801
	46.02	13.1852
	46.307	13.9433
	46.369	14.259
	46.687	14.5285
	46.825	14.7077
	47.09	14.7371
	47.115	15.6184
	47.279	15.6576
	48.16	15.8746
	50.556	17.1731
	52.37	17.3138
	52.535	18.5402
	53.647	19.0176
	55.389	19.3424
	55.495	19.4663
	56.748	21.2681
	57.031	21.3283
	57.796	22.5806
	59.615	22.9313
	62.129	23.8728
	62.5	25.3015
	64.417	25.4968
	65.68	25.5087
	67.112	25.6298
	67.857	26.2052
	68.132	26.4075
	69.355	27.265
	69.828	27.5884
	70.635	28.7238
	71.748	34.2657
	72.571	34.5954
	73.387	35
	73.698	35.343
	80.048	43.1669
	80.083	43.2894
	80.102	44.793
	82.123	46.4506
	82.375	47.9346
	85.119	47.9542
	85.366	48.5758
	86.879	52.4034
	87.023	54.362
	87.264	57.6471
	88.218	59.4524
	90.486	63.2695
	91.562
	92.484
	95.395
	97.266
	97.5
	99.655
	100

## Sheet: Fig. 5F
AKAP9	nuclear envelope coverage [%]
	si-ctrl	si-Akap6
		0.243
	4.683	5.616
	14.238	9.828
	2.202	2.29185
	7.7955	6.9255
	36.3561	14.067
	3.972	4.536
	11.58	8.1765
	1.413	0.70785
	4.8495	5.652
	14.346	9.9945
	2.2425	2.36115
	8.0895	6.9525
	36.4272	14.0895
	4.0425	4.62825
	11.91	8.2269
	2.7555	3.4335
	2.8725	3.44025
	8.439	7.1577
	8.4465	7.326
	41.007	16.3485
	46.3379	16.9605
	4.329	5.0535
	4.404	5.1579
	13.035	8.97435
	13.8075	8.99415
	2.0745	1.5795
	2.103	1.6434
	7.431	6.44985
	7.443	6.4665
	32.2365	11.4705
	33.2715	11.7
	1.4415	1.1385
	4.9755	5.679
	14.7295	10.0732
	2.2755	2.7945
	8.3565	6.9705
	37.5968	14.733
	4.164	4.689
	11.9505	8.2467
	1.857	1.5795
	6.8265	6.44985
	26.2674	11.4705
	3.7185	4.023
	9.5895	7.7616
	1.4415	0.558
	5.5755	5.679
	18.153	10.0732
	0.741	0.558
	1.3395	0.6435
	1.464	1.3365
	5.1615	5.679
	5.1945	5.72715
	5.358	5.8635
	15.6025	10.1205
	16.0686	10.1475
	16.211	10.1835
	2.7225	3.07395
	2.7555	3.1275
	2.8725	3.312
	8.361	7.03395
	8.439	7.056
	8.4465	7.11315
	40.4698	14.9895
	41.007	15.228
	46.3379	15.8085
	4.1745	4.85595
	4.329	4.9896
	4.404	5.013
	12.6	8.54865
	13.035	8.838
	13.8075	8.87535
	1.71	1.47015
	5.5755	6.1776
	18.153	10.2317
	3.063	3.4335
	8.5185	7.1577
	61.2345	16.3485
	4.413	5.0535
	14.22	8.97435
	2.1135	2.36115
	7.569	6.9525
	35.814	14.0895
	3.9	4.62825
	10.8825	8.2269
	1.8105	1.3365
	6.7665	6.2172
	23.4283	10.8108
	1.7025	1.4175
	5.625	6.183
	18.744	10.638
	3.2325	3.44025
	8.6295	7.326
	69.195	16.9605
	4.683	5.1579
	14.238	8.99415
	3.537	3.8214
	8.94	7.64775
	0.741	0.243
	4.9755	5.616
	14.7295	9.828
	2.2755	2.29185
	8.3565	6.9255
	37.5968	14.067
	0.7365	0.2673
	5.727	6.2172
	20.5129	10.8108
	3.516	3.474
	8.67	7.479
	0.7365	17.2755
	4.8495	5.2065
	14.346	9.1575
	3.063	3.474
	8.5185	7.479
	61.2345	17.2755
	4.413	5.2065
	14.22	9.1575
	2.1135	1.73745
	7.569	6.507
	35.814	12.528
	3.8115	4.4253
	4.0425	5.013
	9.8925	8.1585
	11.91	8.87535
	1.464	1.1385
	1.875	1.55925
	5.727	6.1776
	7.2135	6.3945
	20.5129	10.2317
	26.2965	11.2019
	3.516	3.4335
	3.786	3.87
	8.67	7.1577
	9.7995	7.66755
		16.3485
	2.2755	3.1275
	8.3565	7.056
	37.5968	15.228
	4.164	4.9896
	11.9505	8.838
	1.9815	1.494
	7.2795	6.2469
	29.715	11.1623
	1.875	1.6434
	7.2135	6.4665
	26.2965	11.7
	3.786	4.2075
	9.7995	7.7715
	1.4535	0.6138
	5.625	5.679
	18.744	10.1205
	2.202	2.7945
	7.7955	6.9705
	36.3561	14.733
	3.972	4.689
	11.58	8.2467
	1.857	1.4175
	6.8265	6.219
	26.2674	10.9939
	1.29	0.6138
	6.357	6.219
	20.733	10.9939
	3.537	3.6432
	8.94	7.497
	0.741	17.4735
	4.9755	5.5143
	14.7295	9.3015
	1.9815	1.73745
	7.2795	6.507
	29.715	12.528
	3.8115	4.257
	9.8925	8.0586
	1.464	0.6435
	5.727	5.72715
	20.5129	10.1475
	1.4535	1.25235
	6.5085	6.2469
	21.1807	11.1326
	3.573	3.77685
	9.1995	7.61805
	1.29	18.072
	5.1615	5.55885
	15.6025	9.7218
	1.794	1.494
	6.594	6.2469
	23.2455	11.1623
	3.708	3.8214
	9.3975	7.64775
	1.3395	0.243
	5.1945	5.616
	16.0686	9.828
	3.2325	3.6432
	8.6295	7.497
	69.195	17.4735
	4.683	5.5143
	14.238	9.3015
	2.202	2.0835
	7.7955	6.8013
	36.3561	13.014
	1.8105	1.55925
	6.7665	6.3945
	23.4283	11.2019
	3.711	3.87
	9.5715	7.66755
	1.413	0.2673
	5.358	5.652
	16.211	9.9945
	3.516	3.77685
	8.67	7.61805
	0.7365	18.072
	4.8495	5.55885
	14.346	9.7218
	2.2425	2.1465
	8.0895	6.8409
	36.4272	13.014
	3.708	4.023
	9.3975	7.7616
	1.3395	0.558
	5.1945	5.679
	16.0686	10.0732
	2.7555	2.7945
	8.439	6.9705
	41.007	14.733
	1.986	2.0835
	7.398	6.8013
	32.1735	13.014
	3.8145	4.4145
	10.0275	8.0685
	1.7025	0.70785
	6.357	5.8635
	20.733	10.1835
	2.103	2.29185
	7.443	6.9255
	33.2715	14.067
	3.897	4.536
	10.296	8.1765
	1.794	1.25235
	6.594	6.183
	23.2455	10.638
	4.164	5.0535
	11.9505	8.97435
	1.9815	1.5795
	7.2795	6.44985
	29.715	11.4705
	3.8115	4.023
	9.8925	7.7616
	4.1745	5.1579
	12.6	8.99415
	1.986	1.6434
	7.398	6.4665
	32.1735	11.7
	3.8145	4.2075
	10.0275	7.7715
	2.0745	2.1465
	7.431	6.8409
	32.2365	13.014
	3.864	4.4253
	10.164	8.1585
	1.71	1.1385
	6.5085	6.1776
	21.1807	10.2317
	2.7225	3.312
	8.361	7.11315
	40.4698	15.8085
	4.1745	5.013
	12.6	8.87535
	1.986	1.55925
	7.398	6.3945
	32.1735	11.2019
	2.2425	3.07395
	8.0895	7.03395
	36.4272	14.9895
	4.0425	4.85595
	11.91	8.54865
	1.875	1.47015
	7.2135	6.2469
	26.2965	11.1326
	3.711	4.2075
	9.5715	7.7715
	1.413	0.6138
	5.358	5.679
	16.211	10.1205
	2.8725	3.07395
	8.4465	7.03395
	46.3379	14.9895
	4.413	5.55885
	14.22	9.7218
	2.1135	2.1465
	7.569	6.8409
	35.814	13.014
	3.9	4.4253
	10.8825	8.1585
	4.404	5.5143
	13.8075	9.3015
	2.103	2.0835
	7.443	6.8013
	33.2715	13.014
	3.897	4.4145
	10.296	8.0685
	3.7185	4.257
	9.5895	8.0586
	1.4415	0.6435
	5.5755	5.72715
	18.153	10.1475
	3.063	3.1275
	8.5185	7.056
	61.2345	15.228
	3.8145	4.536
	10.0275	8.1765
	1.7025	1.25235
	6.357	6.183
	20.733	10.638
	3.537	3.44025
	8.94	7.326
		16.9605
	3.897	4.689
	10.296	8.2467
	1.794	1.4175
	6.594	6.219
	23.2455	10.9939
	3.708	3.6432
	9.3975	7.497
		17.4735
	3.9	4.85595
	10.8825	8.54865
	1.8105	1.47015
	6.7665	6.2469
	23.4283	11.1326
	3.711	3.77685
	9.5715	7.61805
		18.072
	3.573	3.87
	9.1995	7.66755
	1.29	0.2673
	5.1615	5.652
	15.6025	9.9945
	2.7225	2.36115
	8.361	6.9525
	40.4698	14.0895
	4.329	5.2065
	13.035	9.1575
	2.0745	1.73745
	7.431	6.507
	32.2365	12.528
	3.864	4.257
	10.164	8.0586
	3.864	4.62825
	10.164	8.2269
	1.71	1.3365
	6.5085	6.2172
	21.1807	10.8108
	3.573	3.474
	9.1995	7.479
		17.2755
	3.786	4.4145
	9.7995	8.0685
	1.4535	0.70785
	5.625	5.8635
	18.744	10.1835
	3.2325	3.312
	8.6295	7.11315
	69.195	15.8085
	3.972	4.9896
	11.58	8.838
	1.857	1.494
	6.8265	6.2469
	26.2674	11.1623
	3.7185	3.8214
	9.5895	7.64775
