# Supplementary material for: Myogenin controls via AKAP6 non-centrosomal microtubule-organizing center formation at the nuclear envelope
Source: eLife. 2021 Oct 4;10:e65672. doi: 10.7554/eLife.65672 (PMC8523159; doi:10.7554/eLife.65672)
Supplement: Figure 6—source data 1. [file elife-65672-fig6-data1.xlsx]

## Sheet: Fig. 6C
	myotubes with aligned nuclei [%]			myotubes with overlapping nuclei [%]
	si-ctrl	si-Akap6		si-ctrl	si-Akap6
Exp #1	56	32		23	63
Exp #2	68	27		35	67
Exp #3	74	45		20	45
