# Supplementary material for: Myogenin controls via AKAP6 non-centrosomal microtubule-organizing center formation at the nuclear envelope
Source: eLife. 2021 Oct 4;10:e65672. doi: 10.7554/eLife.65672 (PMC8523159; doi:10.7554/eLife.65672)
Supplement: Figure 7—source data 1. [file elife-65672-fig7-data1.xlsx]

## Sheet: Fig. 7B
ChIP-qPCR	Syne1
	E-Box giant	E-Box 1alpha
Exp #1	1.3	5.44
Exp #2	0.81	4.67
Exp #3	0.91	4.8
	all values relative to E-Box giant mean

## Sheet: Fig. 7D
ChIP-qPCR	Akap6
	E-Box alpha	E-Box beta
Exp #1	1.13977	3.75743
Exp #2	1.07906	3.09011
Exp #3	0.781169	2.60877
	all values relative to E-Box alpha mean

## Sheet: Fig. 7E
Luciferase activity relative to alpha mean
	Akap6 promoters
	alpha + GFP	alpha + MYOG	beta + GFP	beta + MYOG
Exp #1	0.702902	1.48	3.18	10.24
Exp #2	1.18262	1.5	2.76	11.79
Exp #3	1.11448	1.7	2.05	10.79

## Sheet: Fig. 7F
Luciferase activity relative to mean of GFP controls
	Syne1 promoters
	giant + GFP	alpha + MYOG		beta + GFP	beta + MYOG
Exp #1	0.95098	2.88168		1.04794	25.7787
Exp #2	1.13155	2.94759		1.02859	20.2521
Exp #3	0.917467	2.30213		0.923472	19.1595
