# Supplementary material for: Myogenin controls via AKAP6 non-centrosomal microtubule-organizing center formation at the nuclear envelope
Source: eLife journal article supplement (doi:10.7554/elife.65672), 2021-10-04

# Becker R *et al.*, Figure 4 - source data 2

Uncropped gel images for Figure 4D. The bands shown in panel 4D are marked by the dashed red line.

upper panel

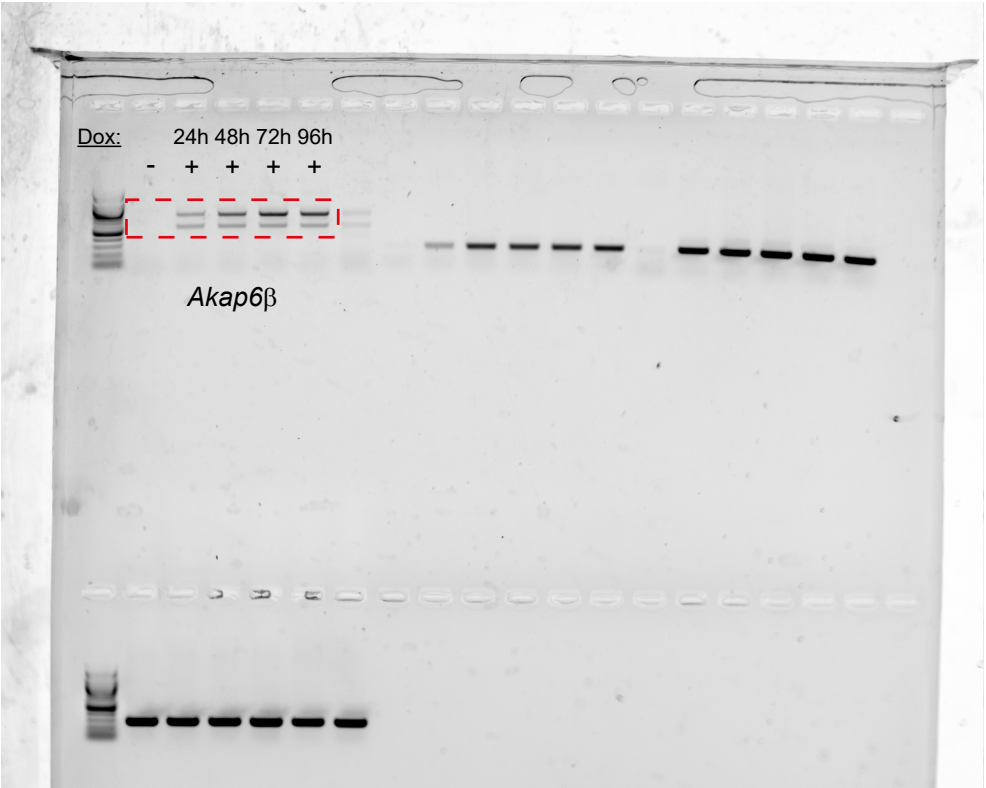

lower panel

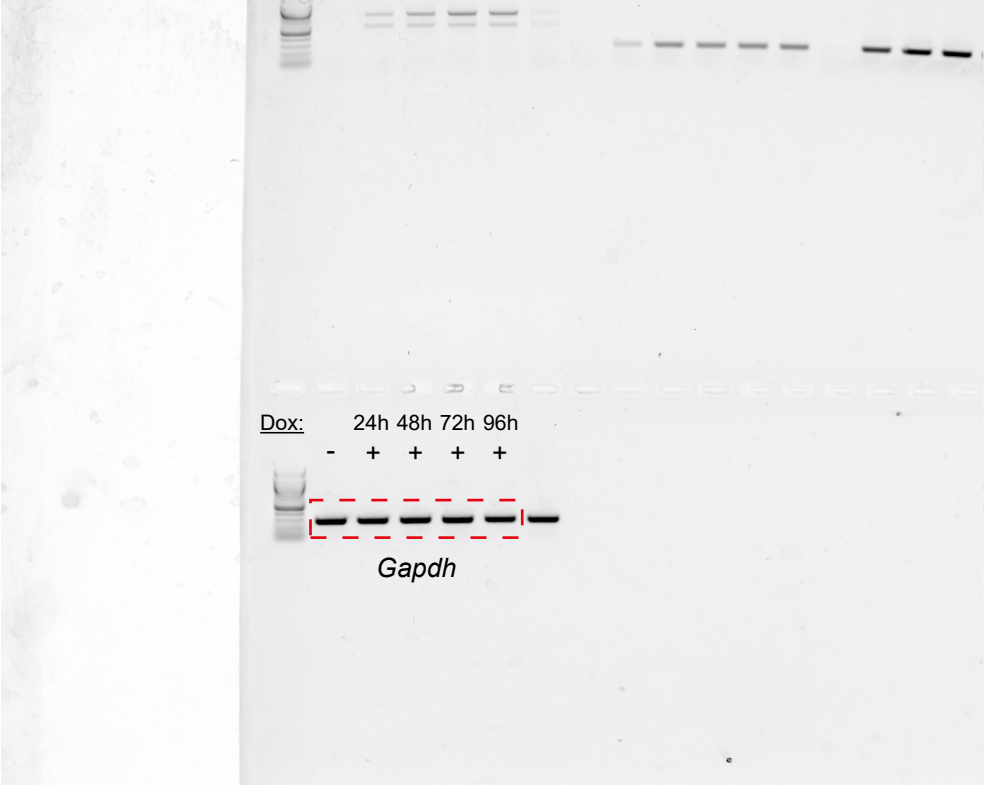

Supplement: supp [file BeckerR_Figure 4 - source data 2.pdf › Figure 4 source data 2/BeckerR_Figure 4 - source data 2.pdf]
