# Supplementary material for: Myogenin controls via AKAP6 non-centrosomal microtubule-organizing center formation at the nuclear envelope
Source: eLife journal article supplement (doi:10.7554/elife.65672), 2021-10-04

# Becker R *et al.*, Figure 2 - figure supplement 3

Microtubule depolymerization in mScarlet and MYOG-mScarlet cells.

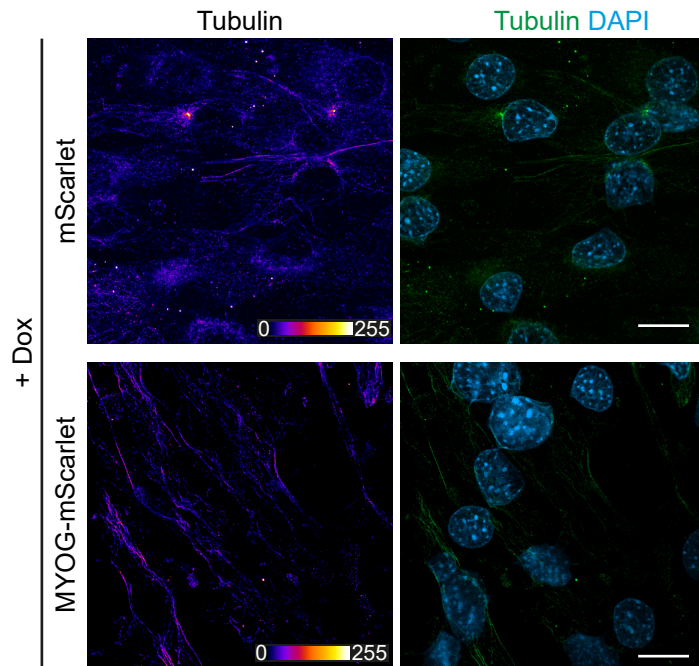

Supplement: supp [file elife_poa_e65672_Figure_2_figure_supplement_3.pdf › elife_poa_e65672_Figure_2_figure_supplement_3.pdf]
