# Supplementary material for: Myogenin controls via AKAP6 non-centrosomal microtubule-organizing center formation at the nuclear envelope
Source: eLife journal article supplement (doi:10.7554/elife.65672), 2021-10-04

**Becker R *et al.*, Figure 4 - figure supplement 1**  
*The myogenin antibody specifically precipitates the Akap6 $\beta$  promoter region in induced MYOG-mScarlet cells.*

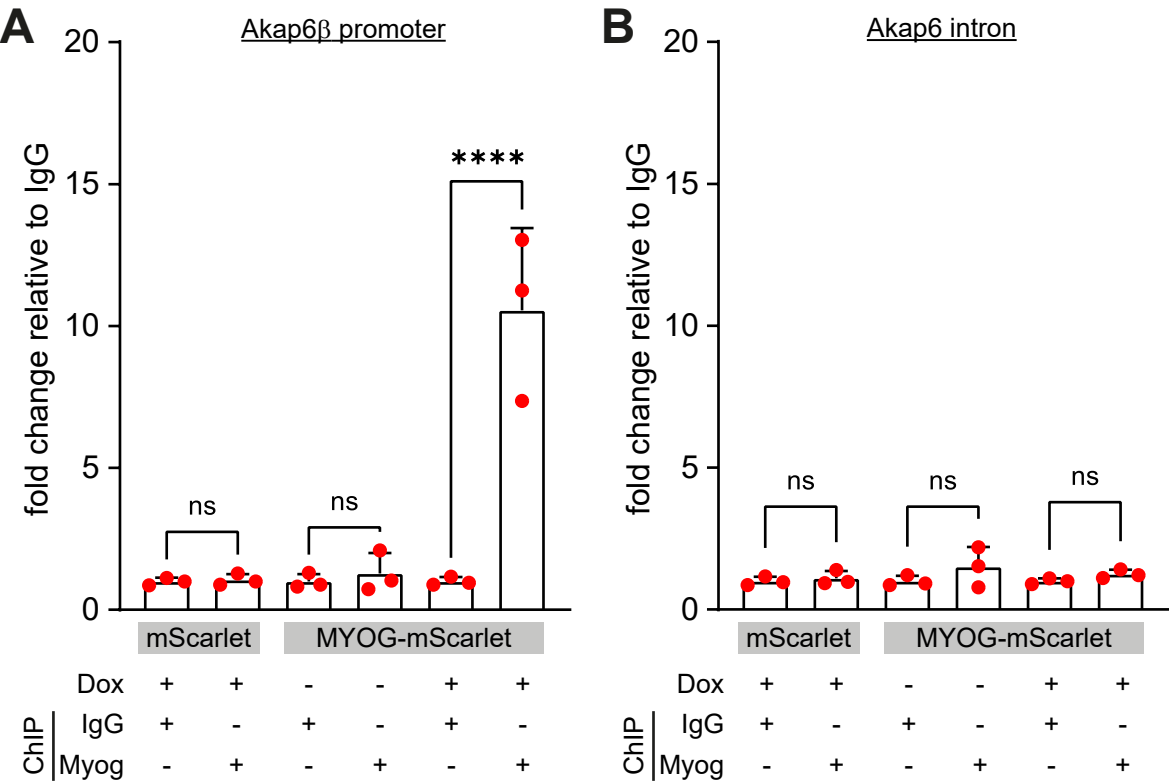

Supplement: supp [file elife_poa_e65672_Figure_4_figure_supplement_1.pdf › elife_poa_e65672_Figure_4_figure_supplement_1.pdf]
