# Supplementary material for: Myogenin controls via AKAP6 non-centrosomal microtubule-organizing center formation at the nuclear envelope
Source: eLife journal article supplement (doi:10.7554/elife.65672), 2021-10-04

# Becker R *et al.*, Figure 5 - figure supplement 2

*AKAP6 or nesprin 1 $\alpha$  depletion does not prevent centrosome attenuation in MYOG-expressing cells.*

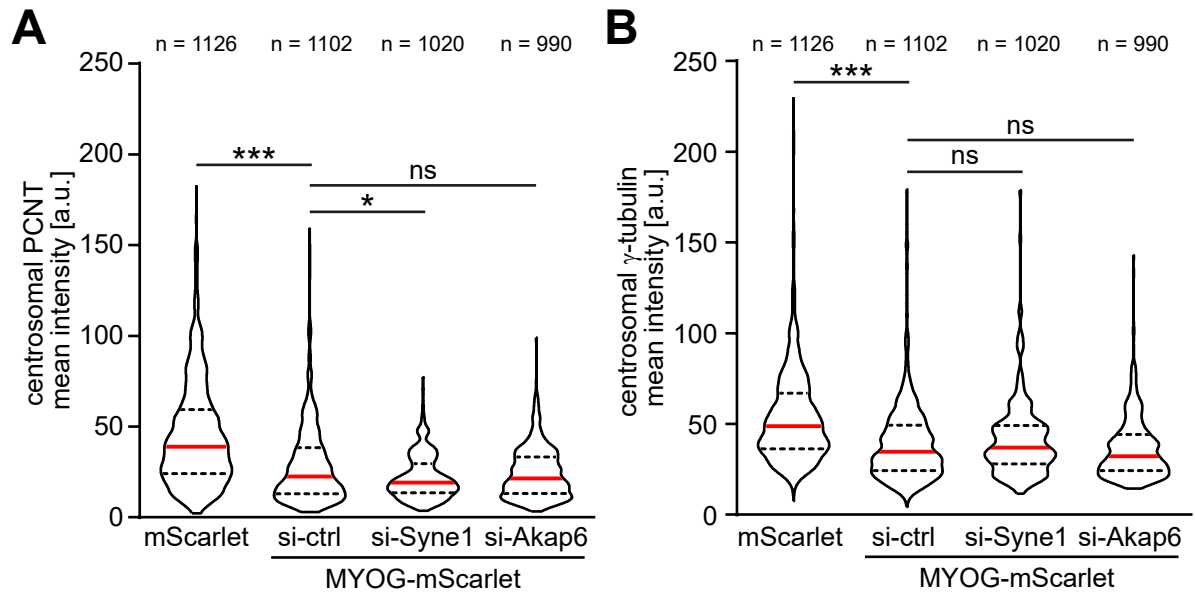

Supplement: supp [file elife_poa_e65672_Figure_5_figure_supplement_2.pdf › elife_poa_e65672_Figure_5_figure_supplement_2.pdf]
