# Supplementary material for: Myogenin controls via AKAP6 non-centrosomal microtubule-organizing center formation at the nuclear envelope
Source: eLife journal article supplement (doi:10.7554/elife.65672), 2021-10-04

# Becker R *et al.*, Figure 6 - figure supplement 1

*AKAP6 depletion does not affect steady state microtubule organization but reduces detyrosinated microtubules.*

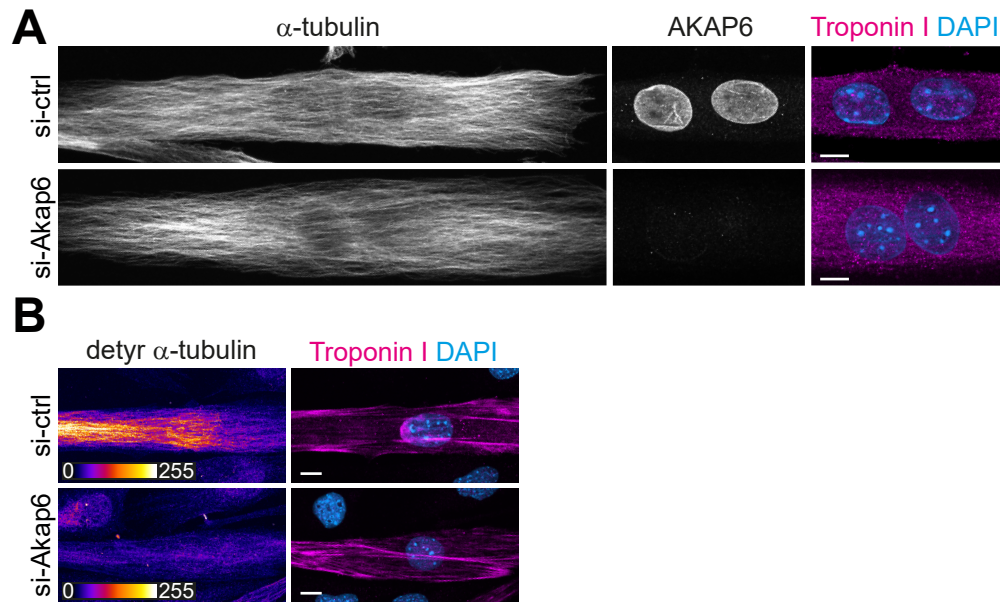

Supplement: supp [file elife_poa_e65672_Figure_6_figure_supplement_1.pdf › elife_poa_e65672_Figure_6_figure_supplement_1.pdf]
