# Supplementary material for: Myogenin controls via AKAP6 non-centrosomal microtubule-organizing center formation at the nuclear envelope
Source: eLife journal article supplement (doi:10.7554/elife.65672), 2021-10-04

# Becker R *et al.*, Figure 7 - Supplemental figure 1

*Ectopic co-expression of nesprin-1 $\alpha$  and AKAP6 $\beta$  is not sufficient for MTOC function at the nuclear envelope.*

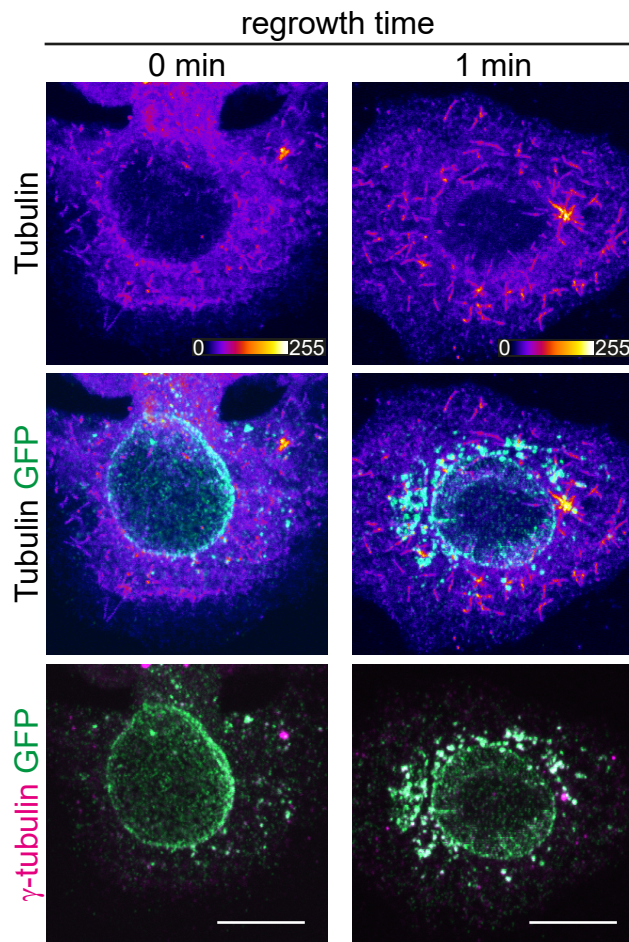

Supplement: supp [file elife_poa_e65672_Figure_7_figure_supplement_1.pdf › elife_poa_e65672_Figure_7_figure_supplement_1.pdf]
