# Supplementary material for: Myogenin controls via AKAP6 non-centrosomal microtubule-organizing center formation at the nuclear envelope
Source: eLife. 2021 Oct 4;10:e65672. doi: 10.7554/eLife.65672 (PMC8523159; doi:10.7554/eLife.65672)
Supplement: Supplementary file 1. [file elife-65672-supp1.xlsx]

## Sheet: Tabelle1
Final targets after intersecting C2C12 RNA-Seq, myogenin ChIP-Seq, and heart development microarray data
	Gene Name	Full Name
	2010111I01Rik	?
	Ablim1	actin binding LIM protein 1
	Acaa2	acetyl-CoA acyltransferase 2
	Acadl	acyl-Coenzyme A dehydrogenase, long-chain
	Adssl1	adenylosuccinate synthetase like 1
	Agl	amylo-alpha-1, 6-glucosidase, 4-alpha-glucanotransferase
	Akap1	A-kinase anchoring protein 1
	Akap6	A-kinase anchoring protein 6
	Angptl4	angiopoietin like 4
	Ankrd1	ankyrin repeat domain 1
	Anxa11	annexin A11
	Apobec2	apolipoprotein B mRNA editing enzyme catalytic subunit 2
	Asph	aspartate beta-hydroxylase
	Atp1a2	ATPase Na+/K+ transporting subunit alpha 2
	Atp9a	ATPase phospholipid transporting 9A
	Bhlhe40	basic helix-loop-helix family member e40
	Bloc1s1	biogenesis of lysosomal organelles complex 1 subunit 1
	Cacna2d1	calcium channel, voltage-dependent, alpha2/delta subunit 1
	Casq2	calsequestrin 2
	Cav3	caveolin 3
	Ccpg1	cell cycle progression 1
	Cdh13	cadherin 13
	Cfl2	cofilin 2
	Ckm	creatine kinase, M-type
	Cmbl	carboxymethylenebutenolidase homolog
	Coq10a	coenzyme Q10A
	Crat	carnitine O-acetyltransferase
	Cryab	crystallin alpha B
	Ctgf	connective tissue growth factor
	Ddr1	discoidin domain receptor tyrosine kinase 1
	Dmpk	DM1 protein kinase
	Dtna	dystrobrevin alpha
	Dtx4	deltex 4, E3 ubiquitin ligase
	Egln3	egl-9 family hypoxia inducible factor 3
	Enah	ENAH, actin regulator
	Eno3	enolase 3, beta muscle
	Fbn1	fibrillin 1
	Fbxo6	F-box protein 6
	Fhod3	formin homology 2 domain containing 3
	Flcn	folliculin
	Fyn	FYN proto-oncogene, Src family tyrosine kinase
	Fzd1	frizzled class receptor 1
	Gja5	gap junction protein, alpha 5
	Gpc1	glypican 1
	Herpud1	homocysteine inducible ER protein with ubiquitin like domain 1
	Hrc	histidine rich calcium binding protein
	Itga7	integrin alpha 7
	Itm2b	integral membrane protein 2B
	Kat2b	lysine acetyltransferase 2B
	Kitl	kit ligand
	Klhl24	kelch like family member 24
	Lama2	laminin, alpha 2
	Lgals3	galectin 3
	Lgmn	legumain
	Loxl1	lysyl oxidase like 1
	Lynx1	Ly6/neurotoxin 1
	Mb	myoglobin
	Mef2a	myocyte enhancer factor 2A
	Mgll	monoglyceride lipase
	Mylk	myosin light chain kinase
	Myzap	myocardial zonula adherens protein
	Ndrg4	NDRG family member 4
	Nfix	nuclear factor I X
	Nrap	nebulin-related anchoring protein
	Parm1	prostate androgen-regulated mucin-like protein 1
	Pcmtd1	protein-L-isoaspartate (D-aspartate) O-methyltransferase domain containing 1
	Pde2a	phosphodiesterase 2A
	Pde4dip	phosphodiesterase 4D interacting protein
	Pdgfrb	platelet derived growth factor receptor beta
	Pdk4	pyruvate dehydrogenase kinase 4
	Pgam2	phosphoglycerate mutase 2
	Phldb2	pleckstrin homology like domain family B member 2
	Pink1	PTEN induced putative kinase 1
	Ptp4a3	protein tyrosine phosphatase type IVA, member 3
	Pygm	glycogen phosphorylase, muscle associated
	Rab11fip5	RAB11 family interacting protein 5
	Rb1	RB transcriptional corepressor 1
	Rb1cc1	RB1 inducible coiled-coil 1
	Ryr3	ryanodine receptor 3
	S100a16	S100 calcium binding protein A16
	Scp2	sterol carrier protein 2
	Scx	scleraxis bHLH transcription factor
	Sema4d	semaphorin 4D
	Serinc3	serine incorporator 3
	Sgcb	sarcoglycan beta
	Sgcg	sarcoglycan gamma [Homo sapiens (human)]
	Slc29a1	solute carrier family 29 member 1
	Slc4a3	solute carrier family 4 member 3
	Smc2	structural maintenance of chromosomes 2
	Sorbs1	sorbin and SH3 domain containing 1
	Sparc	secreted protein acidic and cysteine rich
	Sspn	sarcospan
	Stat3	signal transducer and activator of transcription 3
	Synpo	synaptopodin
	Tcf4	transcription factor 4
	Timp3	TIMP metallopeptidase inhibitor 3
	Tmem119	transmembrane protein 119
	Tmem38a	transmembrane protein 38A
	Tob1	transducer of ERBB2, 1
	Tpm2	tropomyosin 2
	Trp53inp2	transformation related protein 53 inducible nuclear protein 2
	Tspo	translocator protein
	Vegfa	vascular endothelial growth factor A
	Wdr13	WD repeat domain 13
	Wisp1	WNT1 inducible signaling pathway protein 1
	Ypel3	yippee like 3
	Zbtb20	zinc finger and BTB domain containing 20
