# Supplementary figures and images for: Myogenin controls via AKAP6 non-centrosomal microtubule-organizing center formation at the nuclear envelope
Source: eLife journal article supplement (doi:10.7554/elife.65672), 2021-10-04

# Becker R *et al.*, Figure 2 - Supplement 1

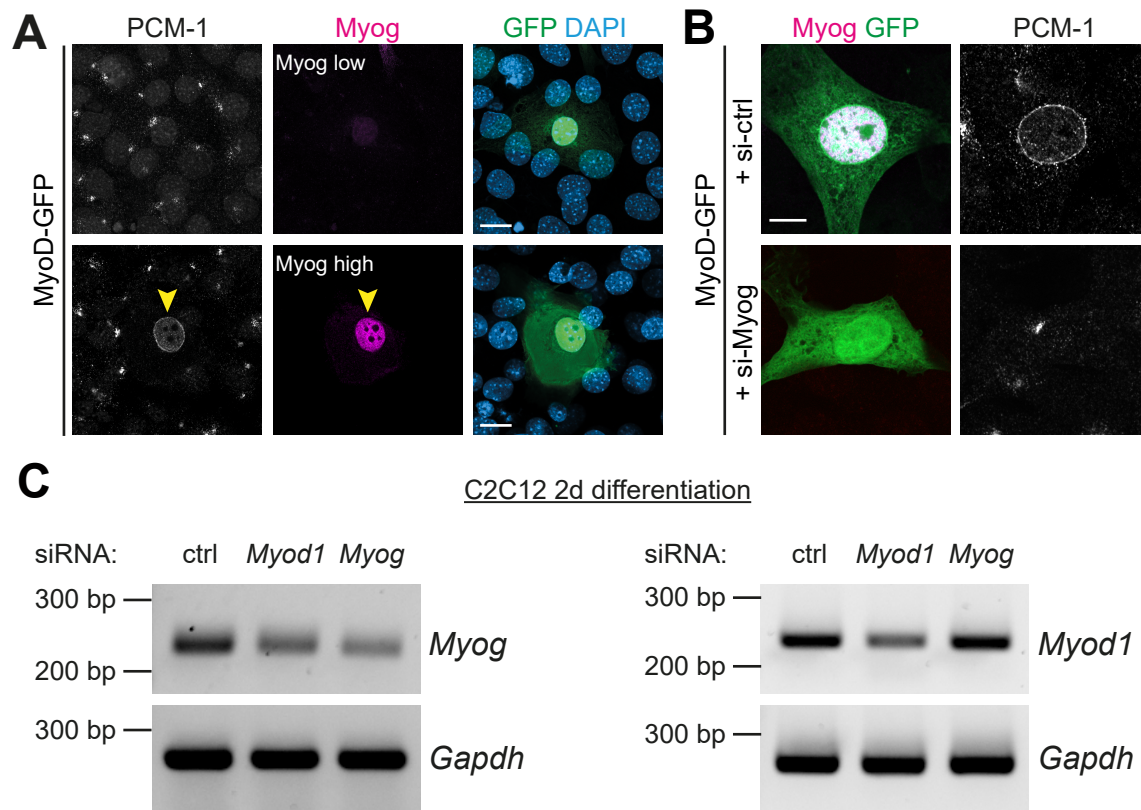

Supplement: supp [file elife_poa_e65672_Figure_2_figure_supplement_1.pdf › elife_poa_e65672_Figure_2_figure_supplement_1.pdf]

Becker R *et al.*, Figure 5 - figure supplement 1  
*AKAP6 depletion does not affect nesprin-1 $\alpha$ .*

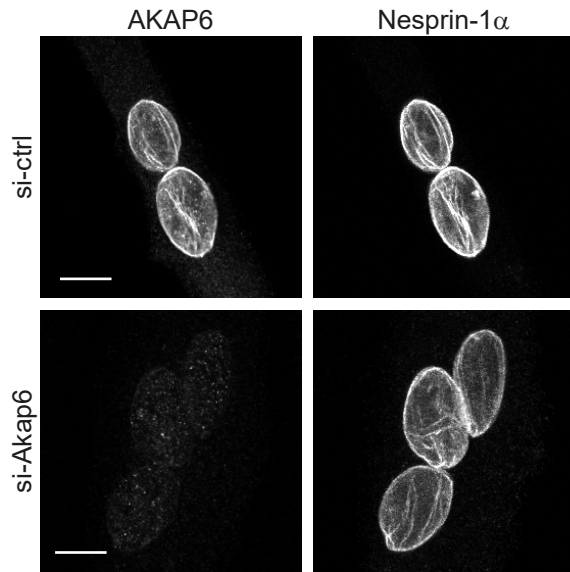

Supplement: supp [file elife_poa_e65672_Figure_5_figure_supplement_1.pdf › elife_poa_e65672_Figure_5_figure_supplement_1.pdf]

# Becker R *et al.*, Figure 5 - figure supplement 3

*MyoD induces nesprin 1 $\alpha$  and AKAP6.*

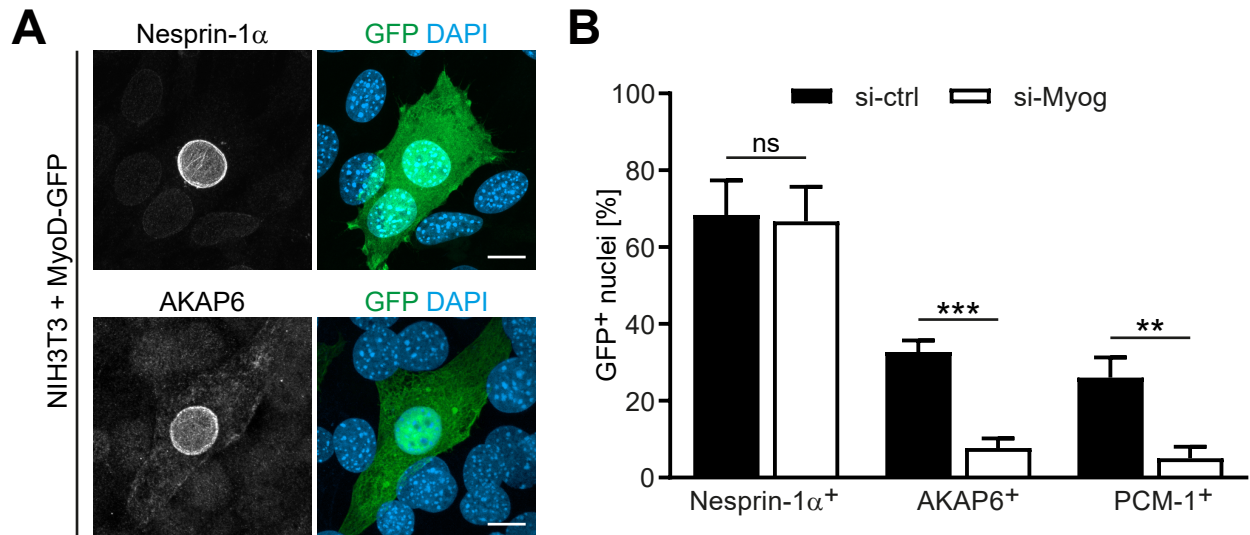

Supplement: supp [file elife_poa_e65672_Figure_5_figure_supplement_3.pdf › elife_poa_e65672_Figure_5_figure_supplement_3.pdf]
